# Supplementary material
Source: PubMed Central journal article supplement (PMC3562390)
Supplement: NIHMS435107-supplement-1_si_001.pdf [file NIHMS435107-supplement-1_si_001.pdf]

## Supporting Information

### Design, Synthesis, Structural and Spectroscopic Studies of Push-Pull Two-Photon Absorbing Chromophores with Acceptor Groups of Varying Strength

Alma R. Morales,<sup>†</sup> Andrew Frazer,<sup>†</sup> Adam W. Woodward,<sup>†</sup> Hyo-Yang Ahn-White,<sup>†</sup> Alexandr Fonari,<sup>§</sup> Paul Tongwa,<sup>§</sup> Tatiana Timofeeva,<sup>§</sup> Kevin D. Belfield,<sup>†‡\*</sup>

<sup>†</sup>*Department of Chemistry and <sup>‡</sup>CREOL, The College of Optics and Photonics, University of Central Florida, Orlando, FL 32816-2366, USA. Fax: 4078232252; Tel: 4078231028;*

<sup>§</sup>*Department of Biology and Chemistry, New Mexico Highlands University, Las Vegas, New Mexico, 87701, USA*

*E-mail: belfield@ucf.edu*

| <b>Table of Contents</b>                                                                                                                      | <b>Pages</b> |
|-----------------------------------------------------------------------------------------------------------------------------------------------|--------------|
| Crystal Packing for <b>1</b> (a), <b>2</b> (b) and <b>6</b> (c)                                                                               | S2           |
| <sup>1</sup> H and <sup>13</sup> C NMR Spectra                                                                                                | S3-S27       |
| Cartesian Coordinates /Å of the optimized ground state geometries of compounds <b>1-7</b> at B3LYP/6-311G** level of theory in the gas phase. | S28-S33      |

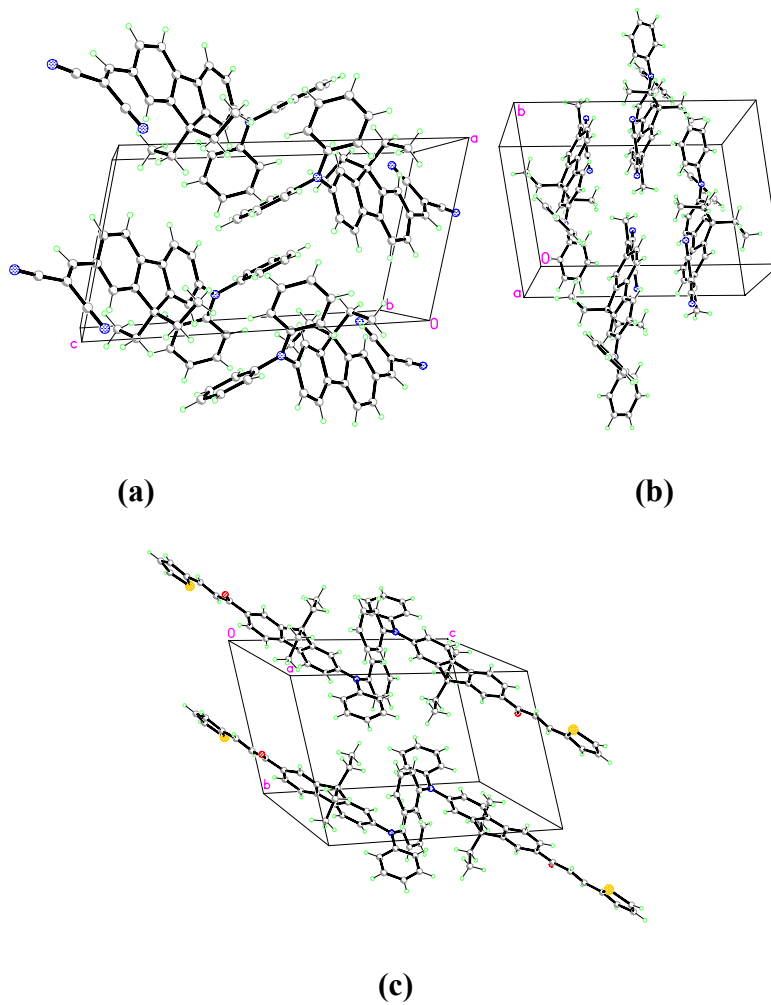

**Figure S1.** Crystal packing for **1** (a), **2** (b) and **6** (c).



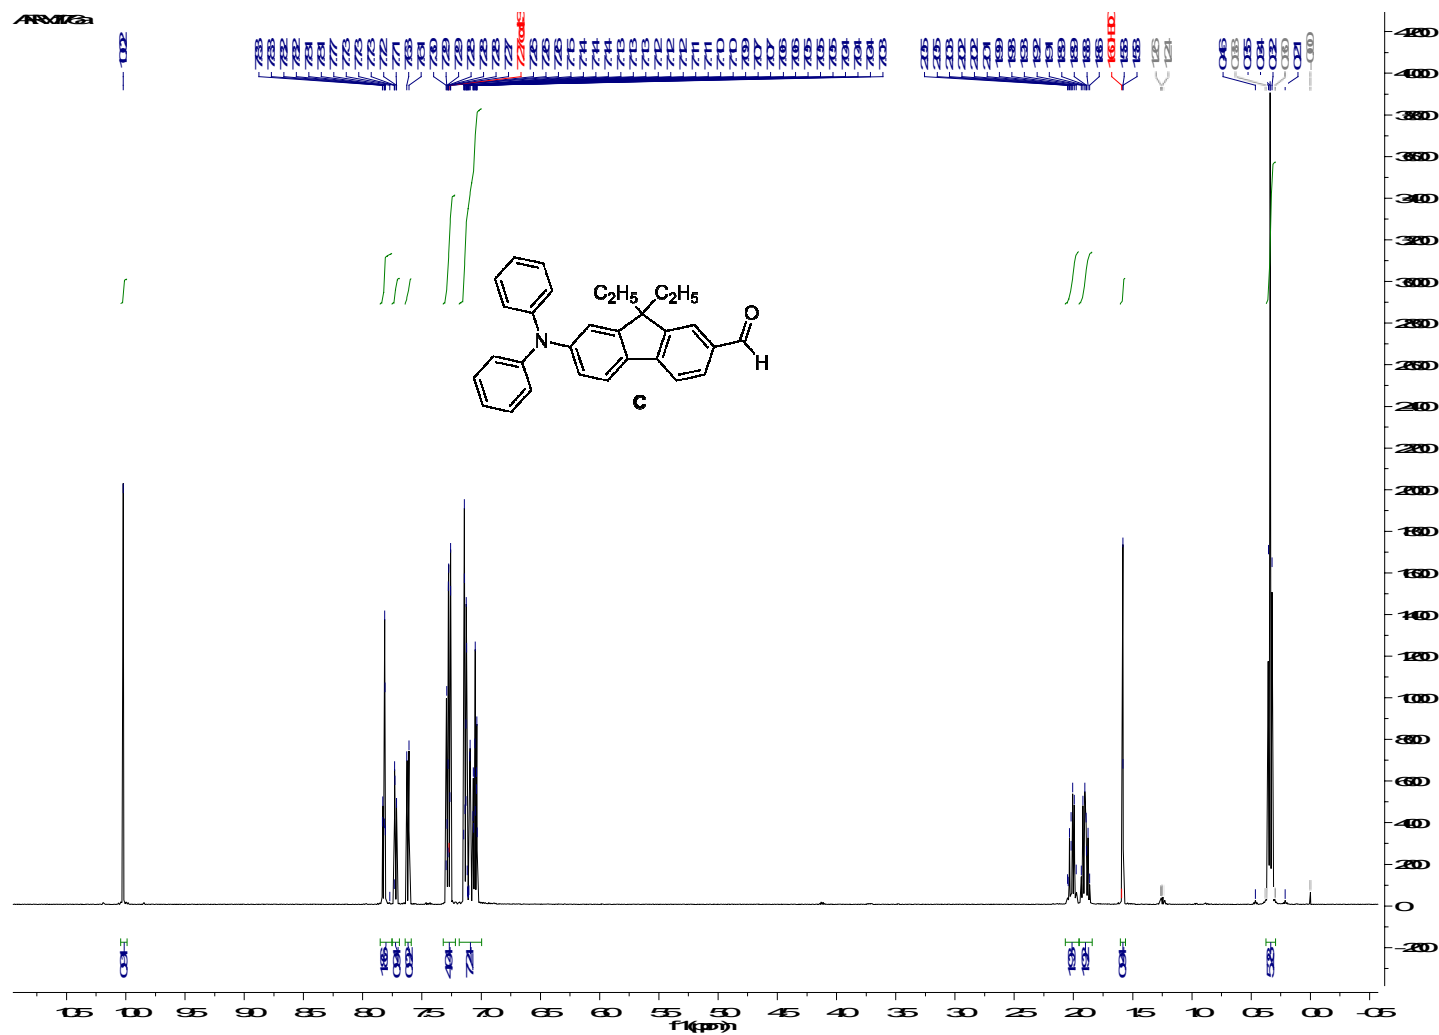

Figure S2. <sup>1</sup>H NMR spectrum of compound C.

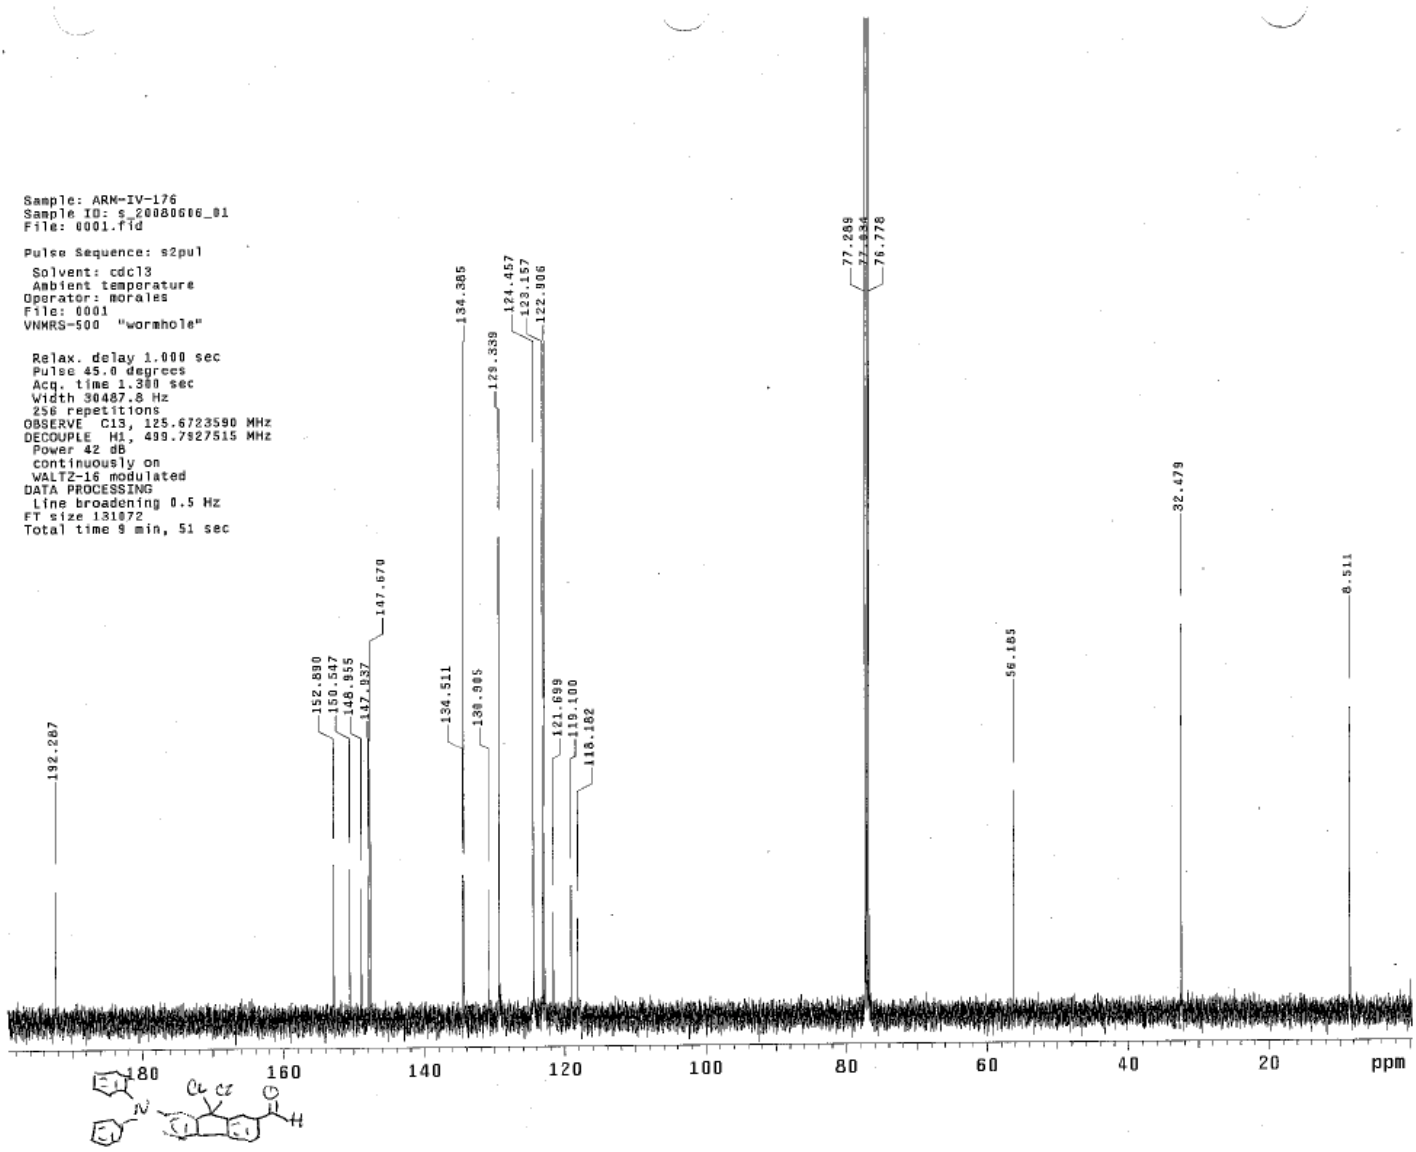

Figure S3. <sup>13</sup>C NMR spectrum of compound C.

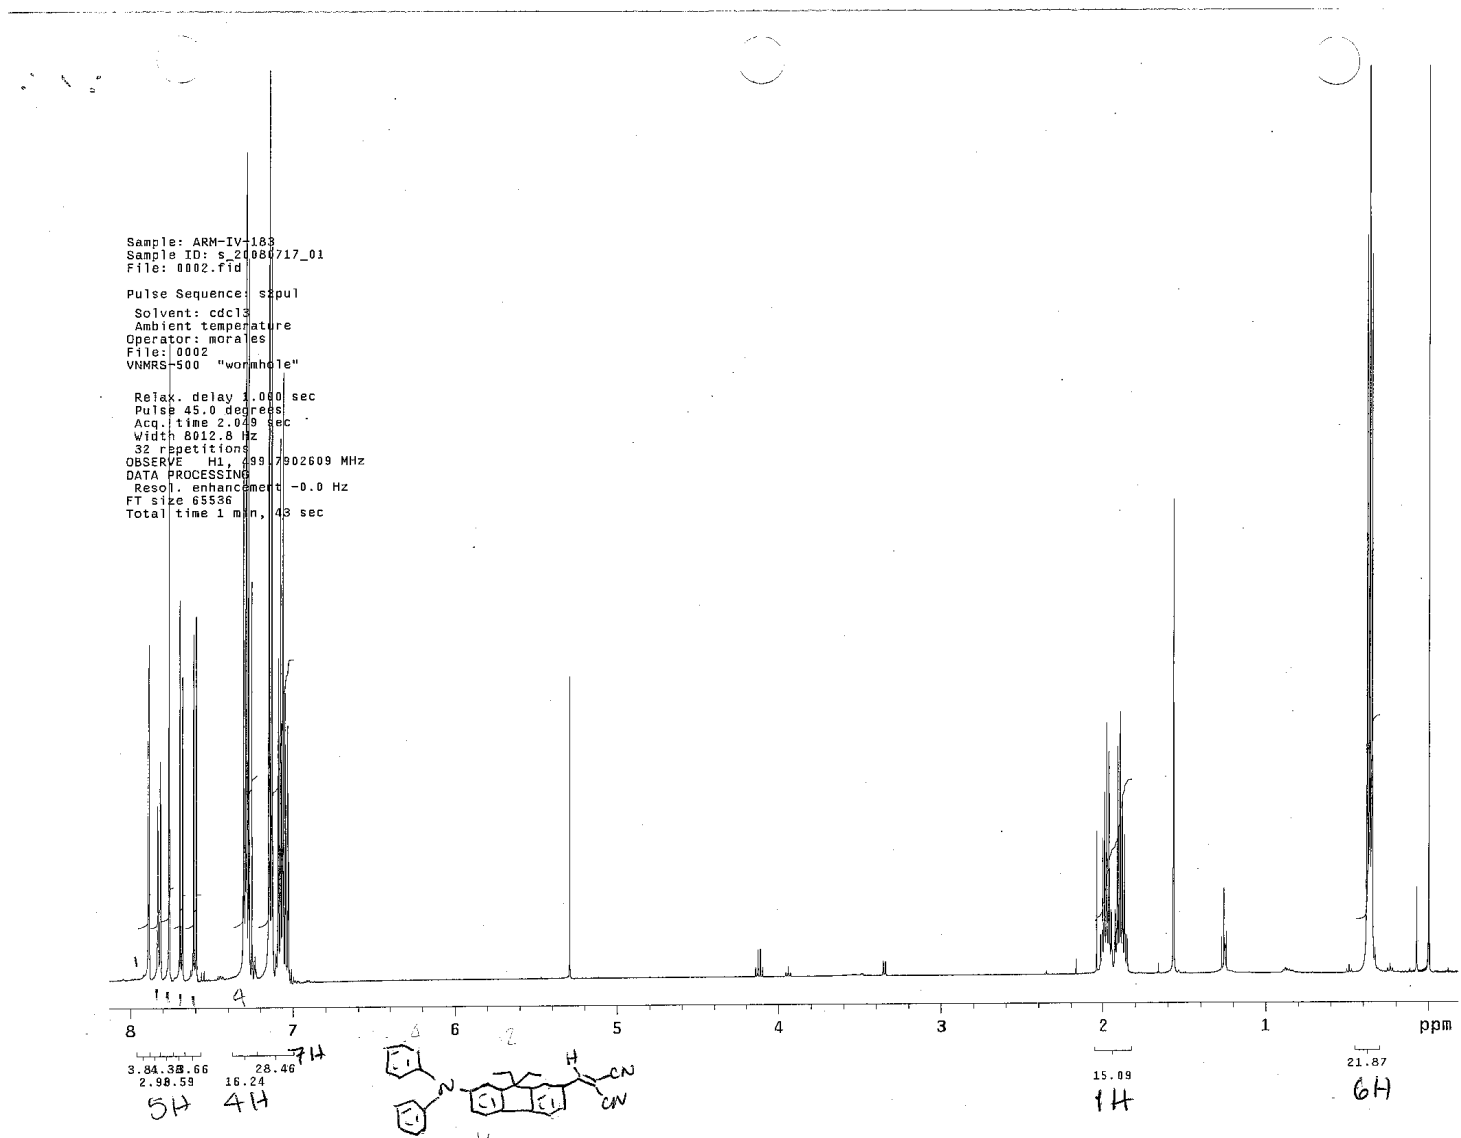

Figure S4.  $^1\text{H}$  NMR spectrum of compound 1.

ARM-IV-184 precipitate in ether

Sample: ARM-IV-183  
Sample ID: s\_20080717\_01  
File: 0002.fid

Pulse Sequence: s2pu1

Solvent: cdc13  
Ambient temperature  
Operator: morales  
File: 0002  
VNMR5-500 "wormhole"

Relax. delay 1.000 sec  
Pulse 45.0 degrees  
Acq. time 1.300 sec  
Width 30487.8 Hz  
256 repetitions  
OBSERVE C13, 125.6723590 MHz  
DECOUPLE H1, 499.7927515 MHz  
Power 42 dB  
continuously on  
WALTZ-16 modulated  
DATA PROCESSING  
Line broadening 0.5 Hz  
FT size 131072  
Total time 9 min 51 sec

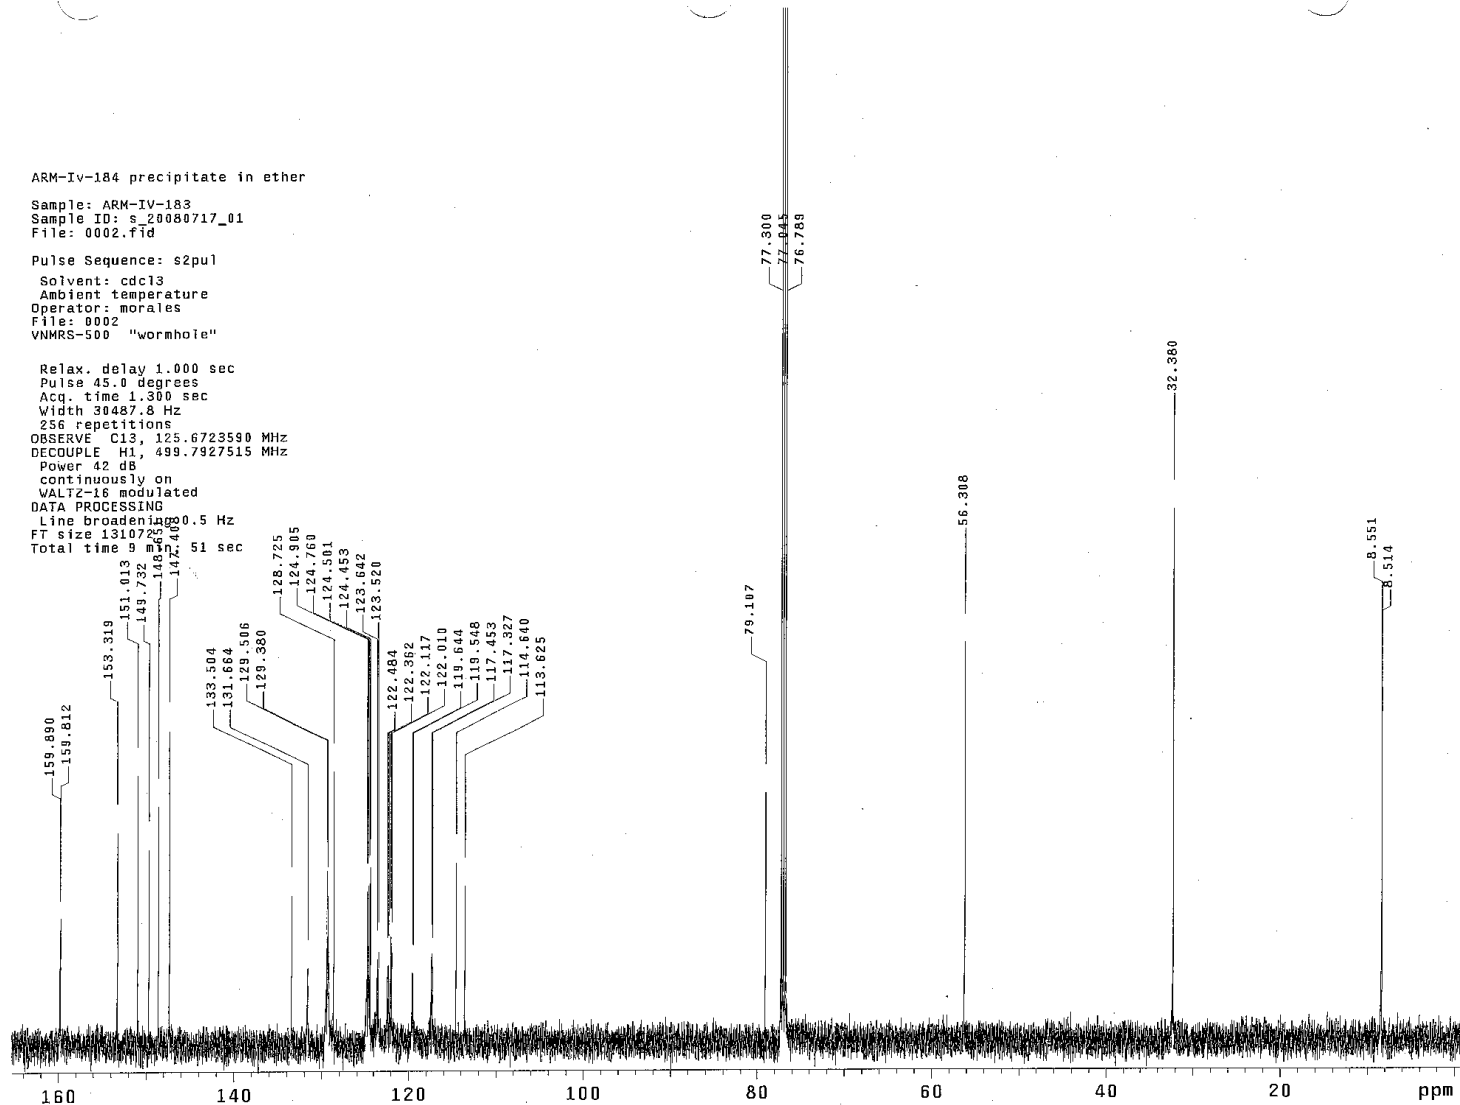

Figure S5.  $^{13}\text{C}$  NMR spectrum of compound 1.

ARMV196  
after column

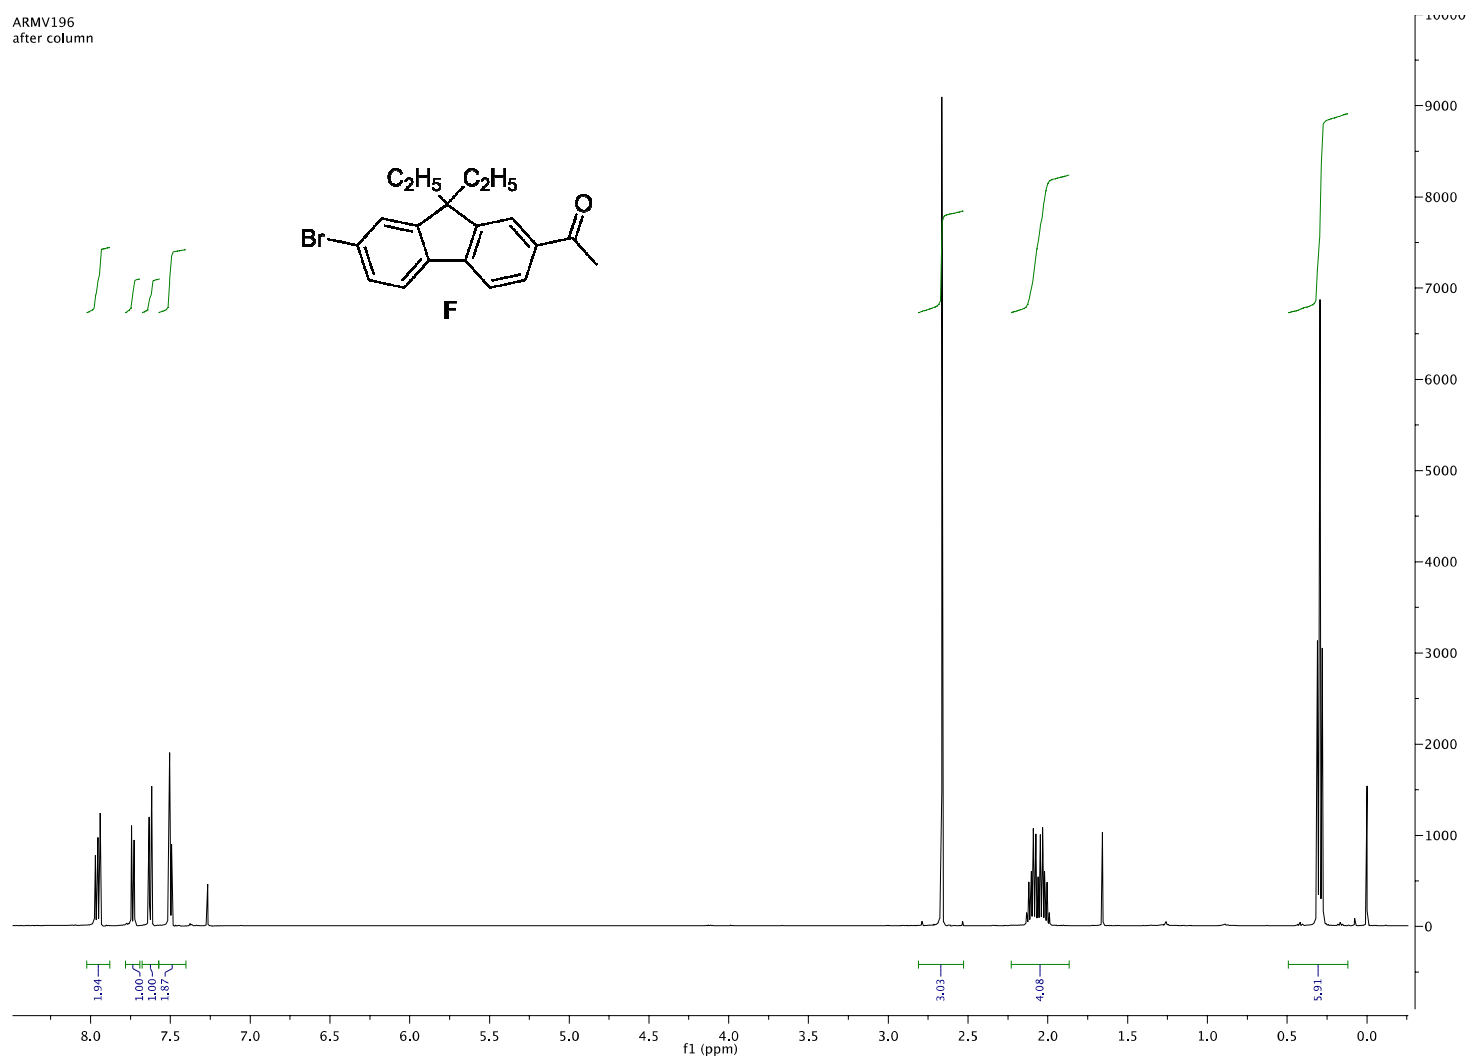

Figure S6. <sup>1</sup>H NMR spectrum of compound F.



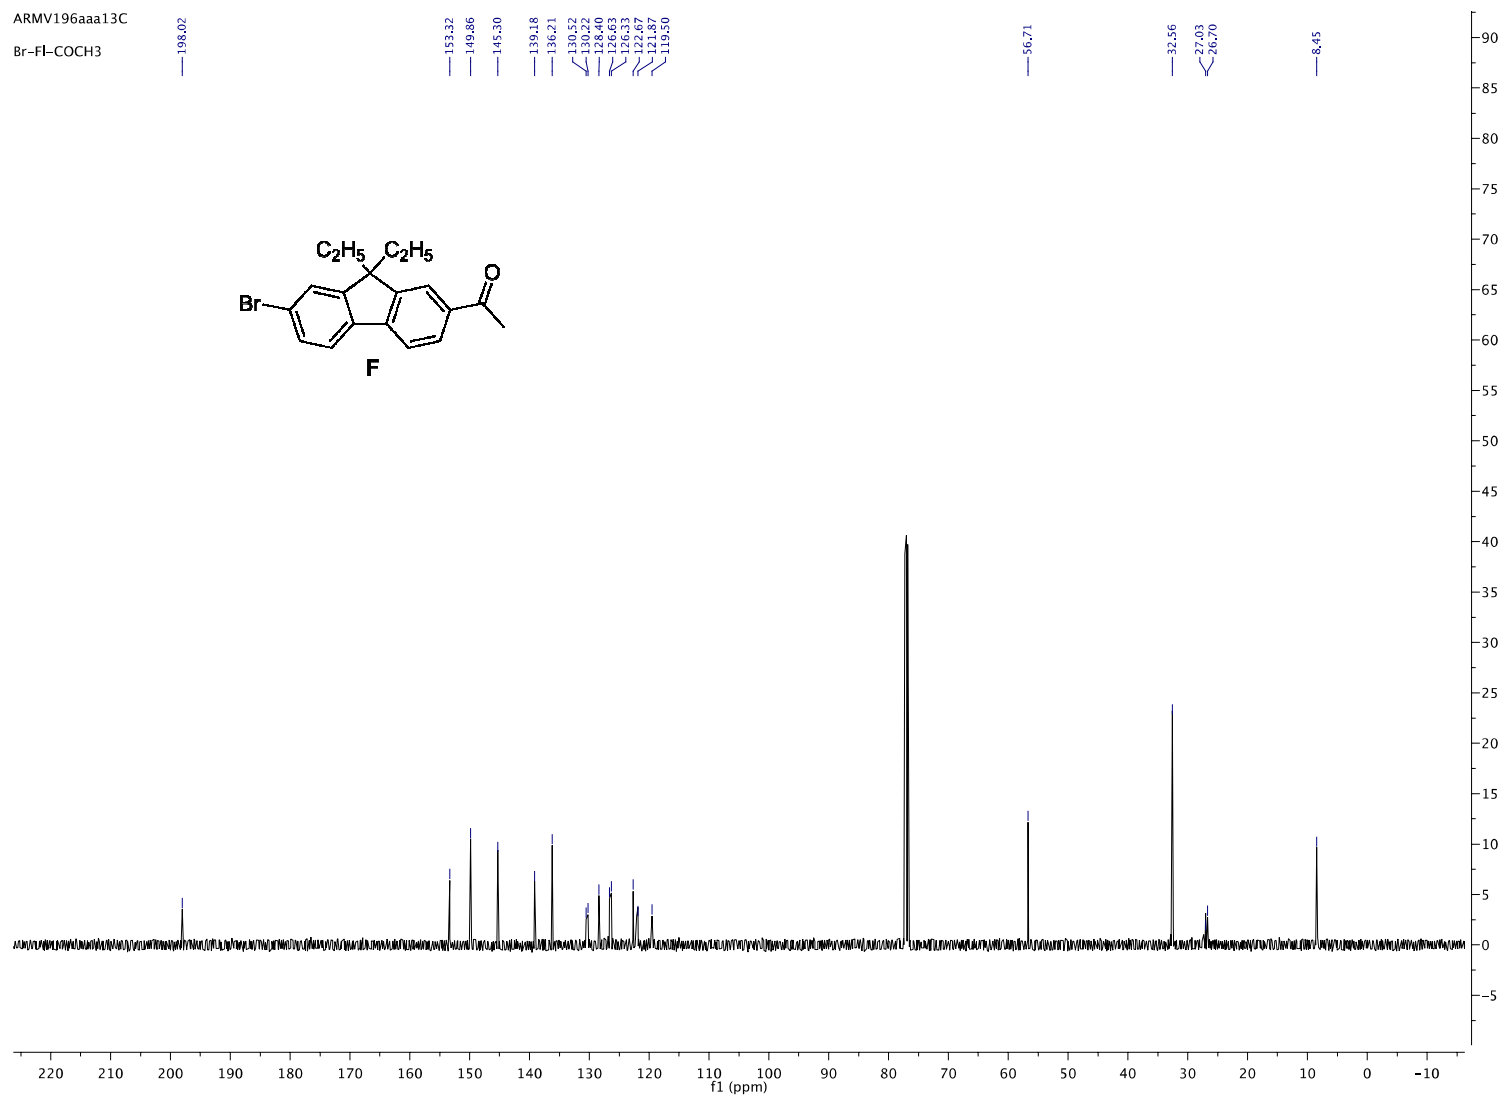

Figure S7. <sup>13</sup>C NMR spectrum of compound F.

ARMV198aaa  
Ph2FCOCH3

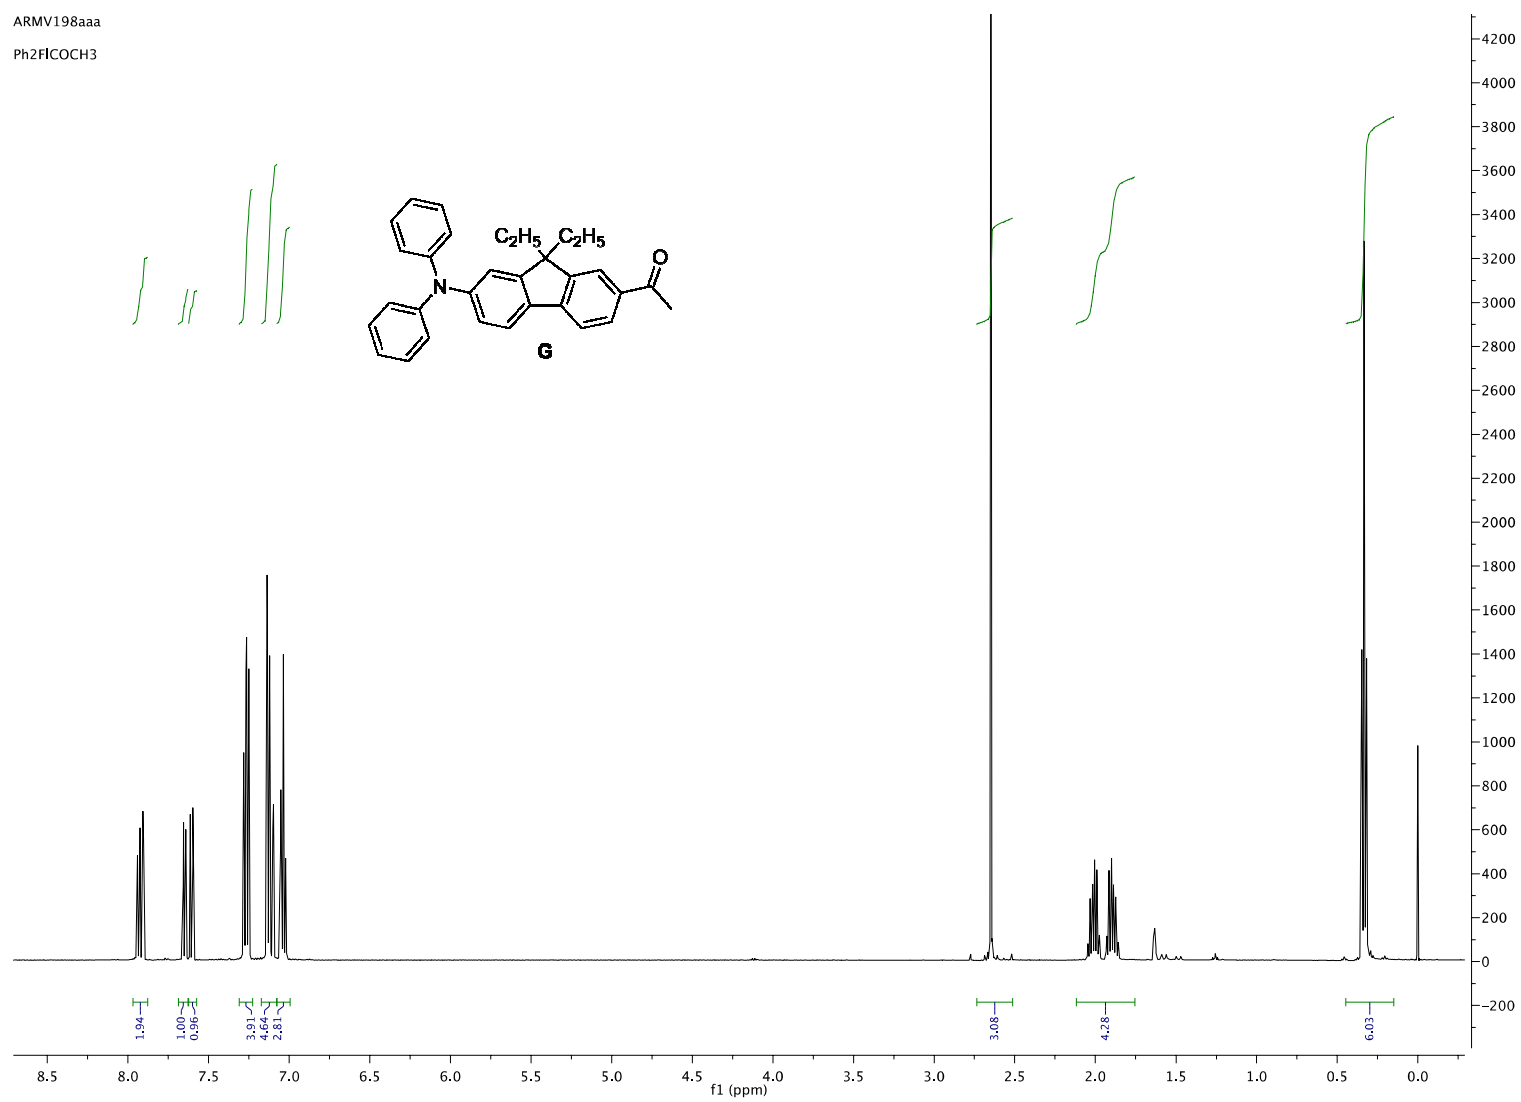

**Figure S8.** <sup>1</sup>H NMR spectrum of compound G.

ARMV198aaa13C

Ph2FCOCH3

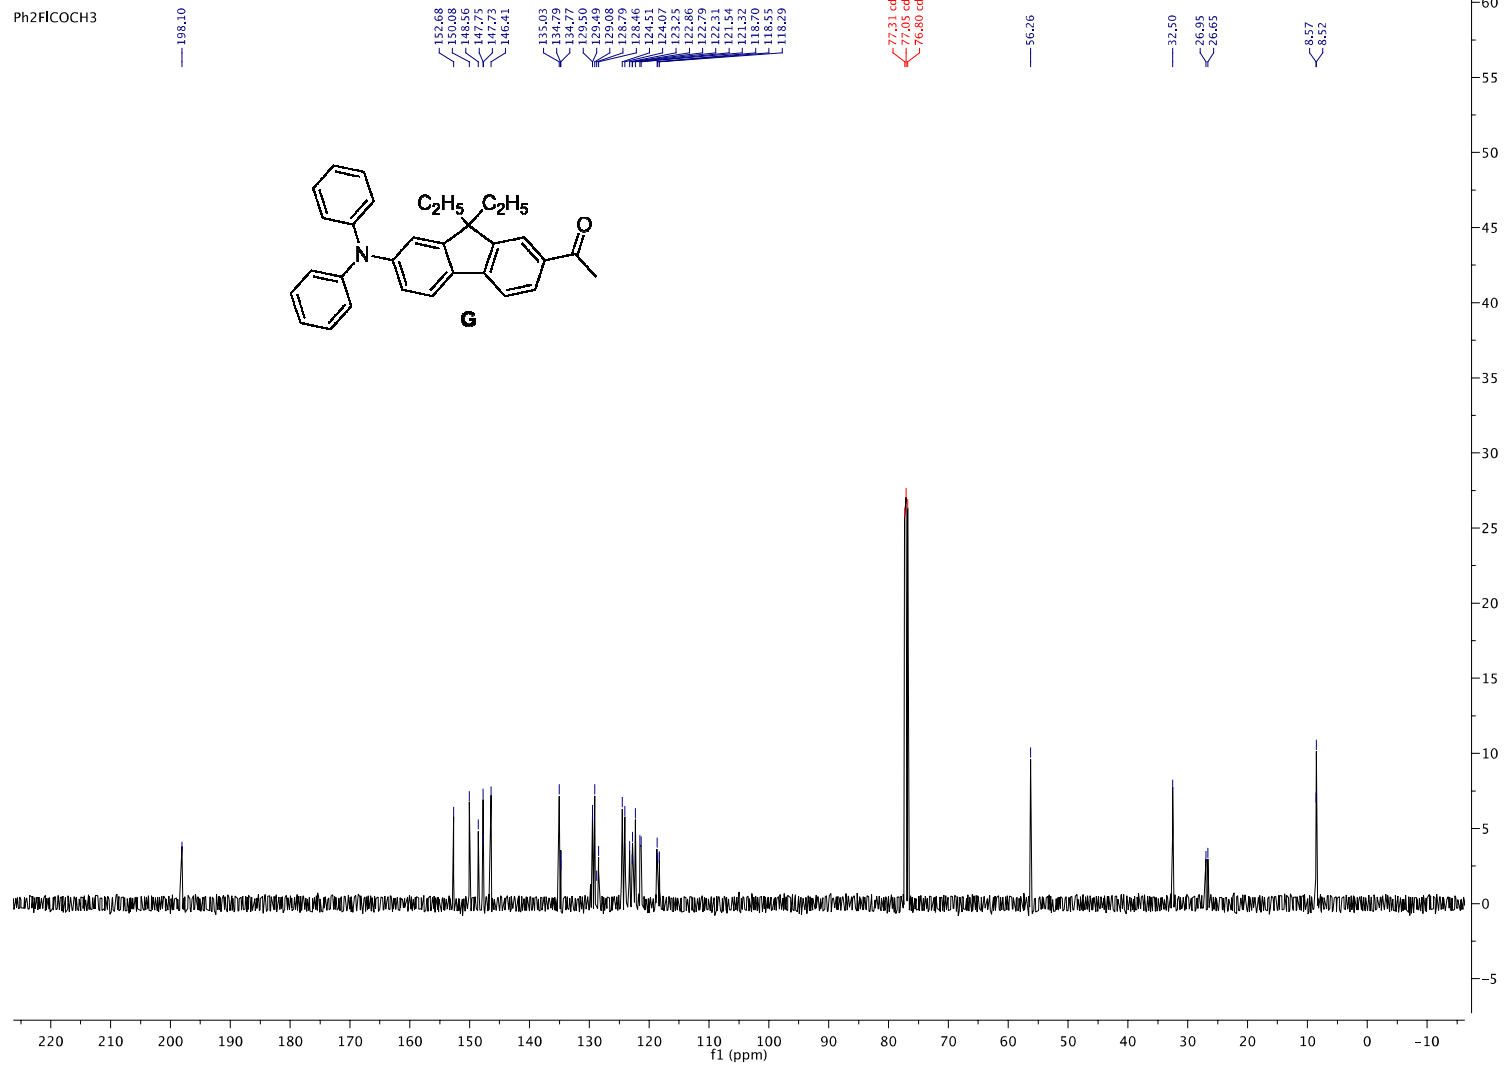

Figure S9.  $^{13}\text{C}$  NMR spectrum of compound G.

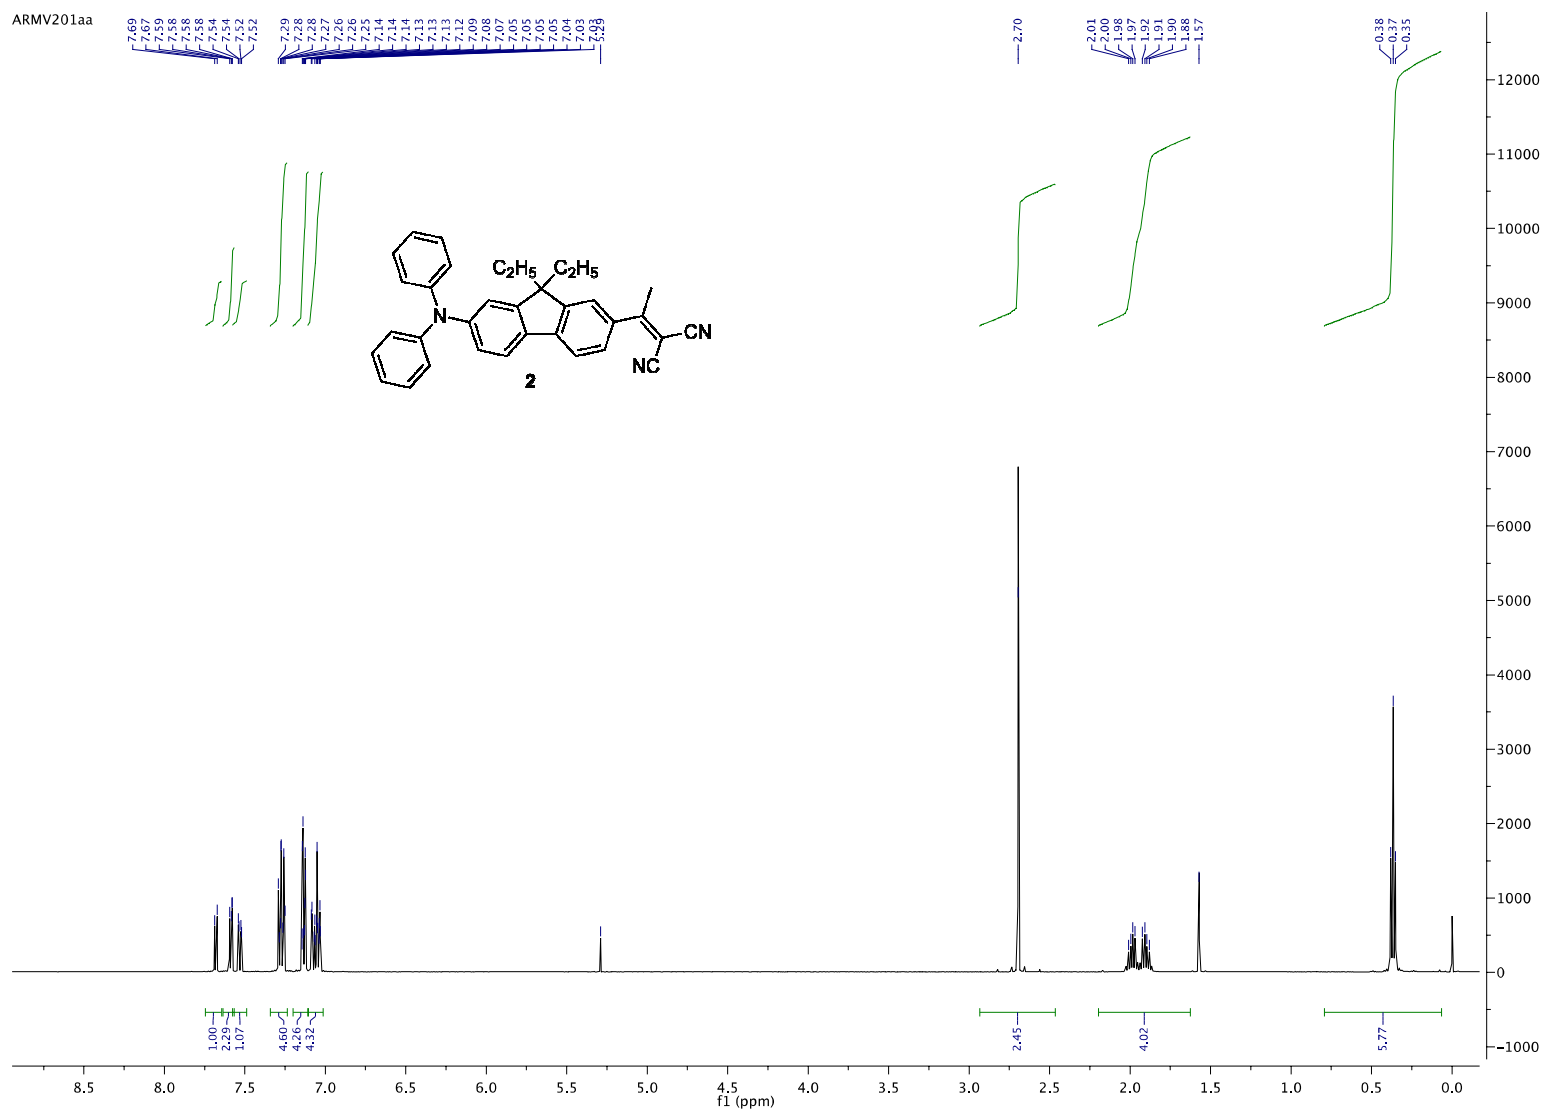

Figure S10.  $^1H$  NMR spectrum of compound **2**.

ARMv201aa13C

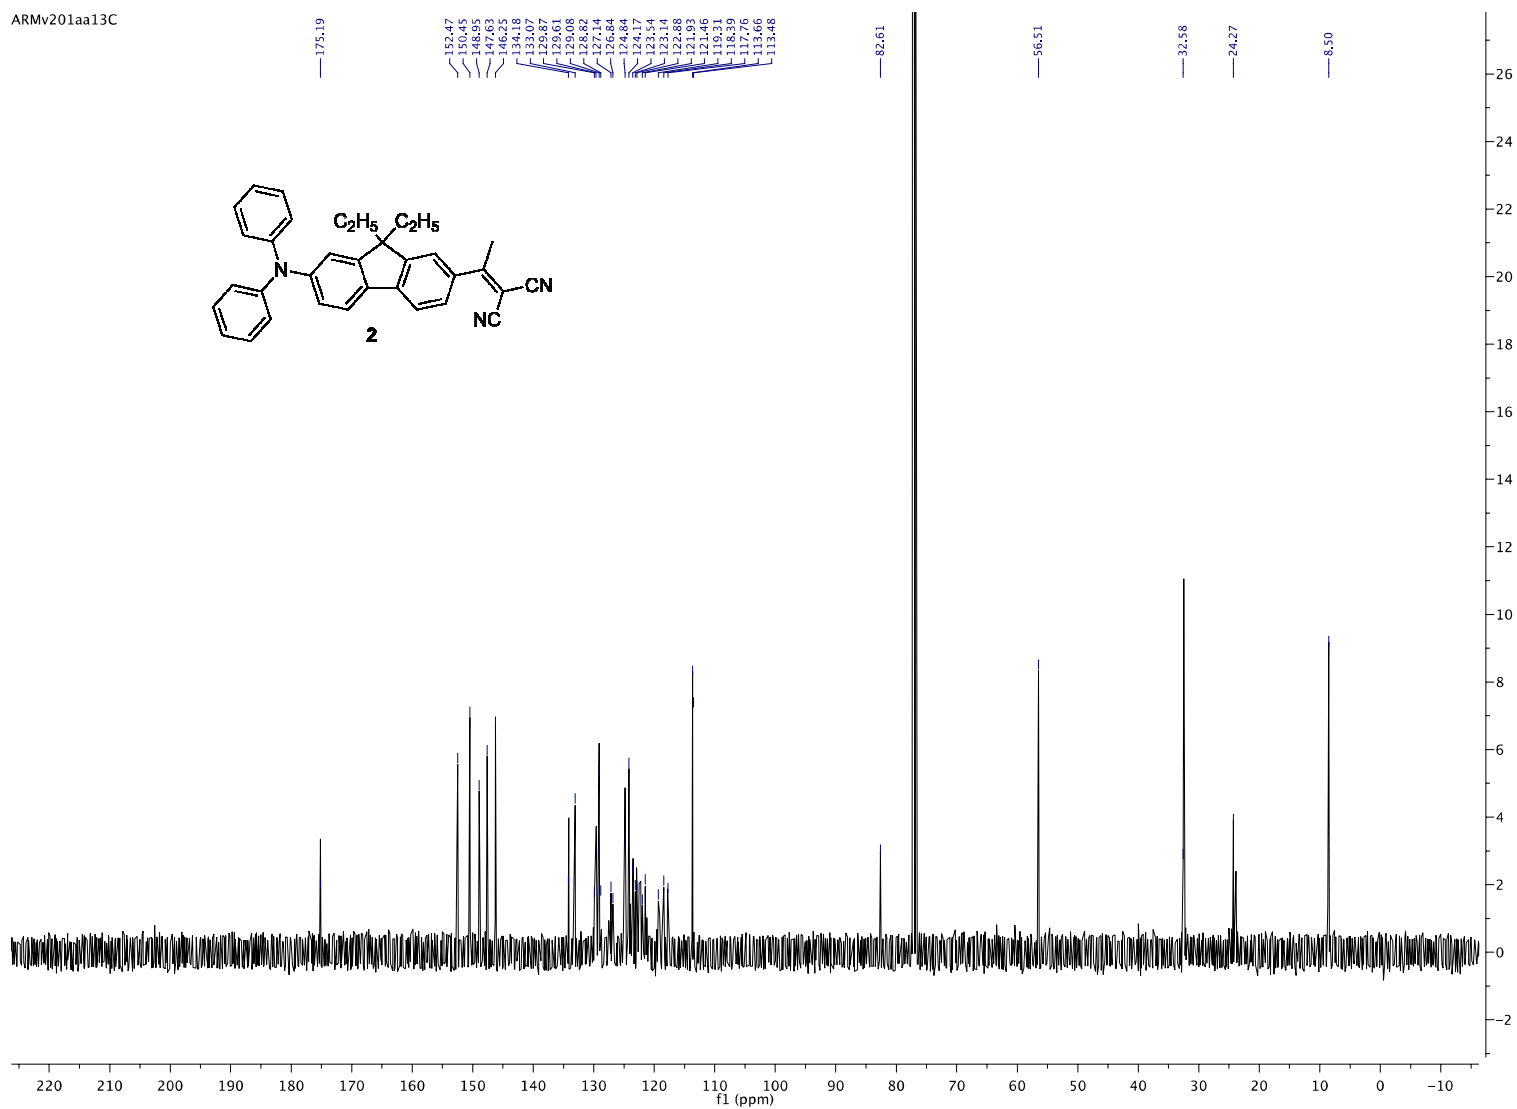

Figure S11. <sup>13</sup>C NMR spectrum of compound 2.

ARMV191

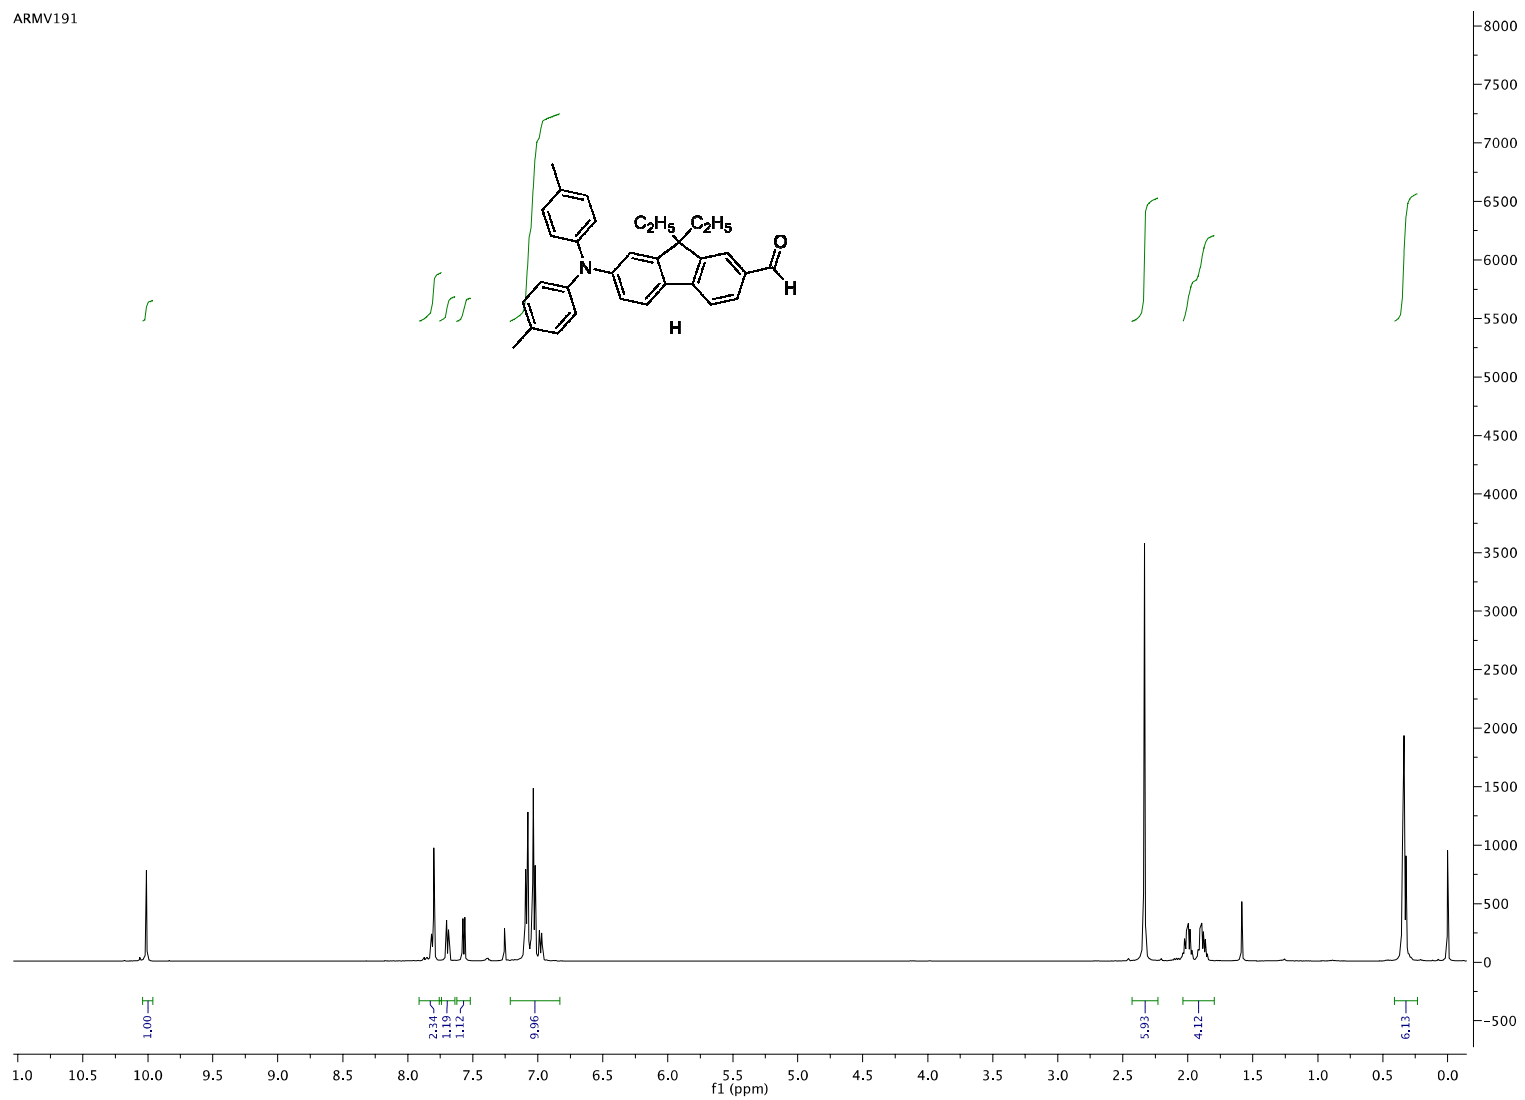

**Figure S12.** <sup>1</sup>H NMR spectrum of compound H.

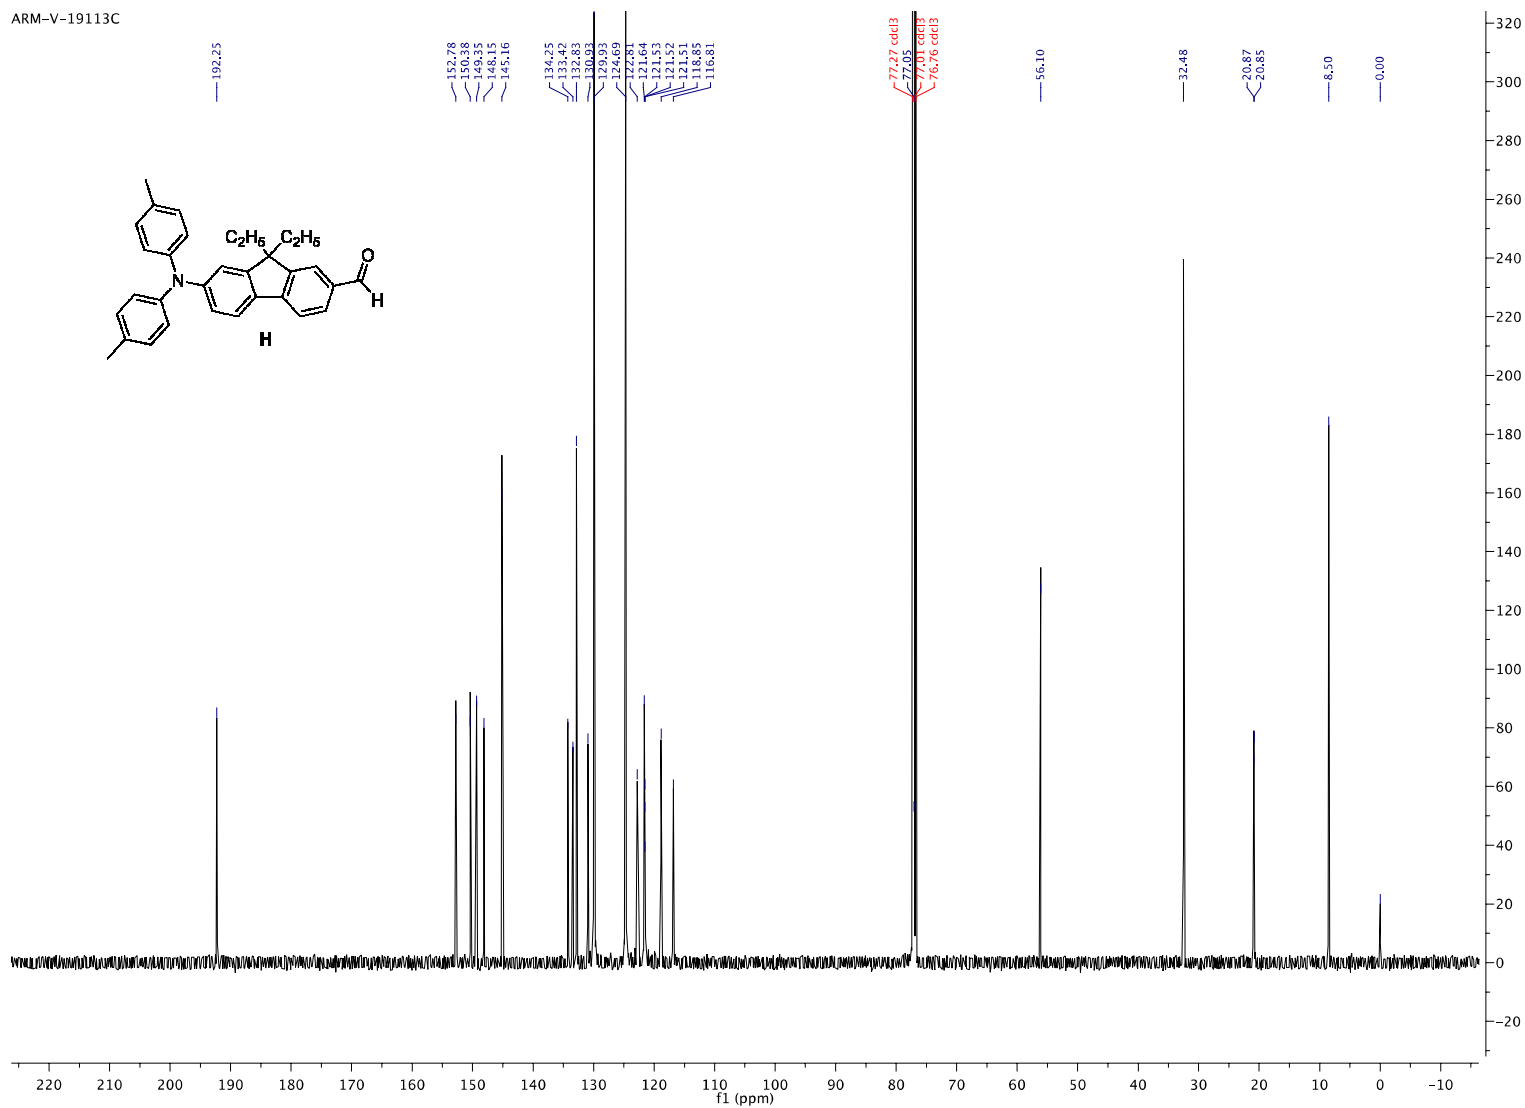

Figure S13.  $^{13}C$  NMR spectrum of compound **H**.

ARMV192

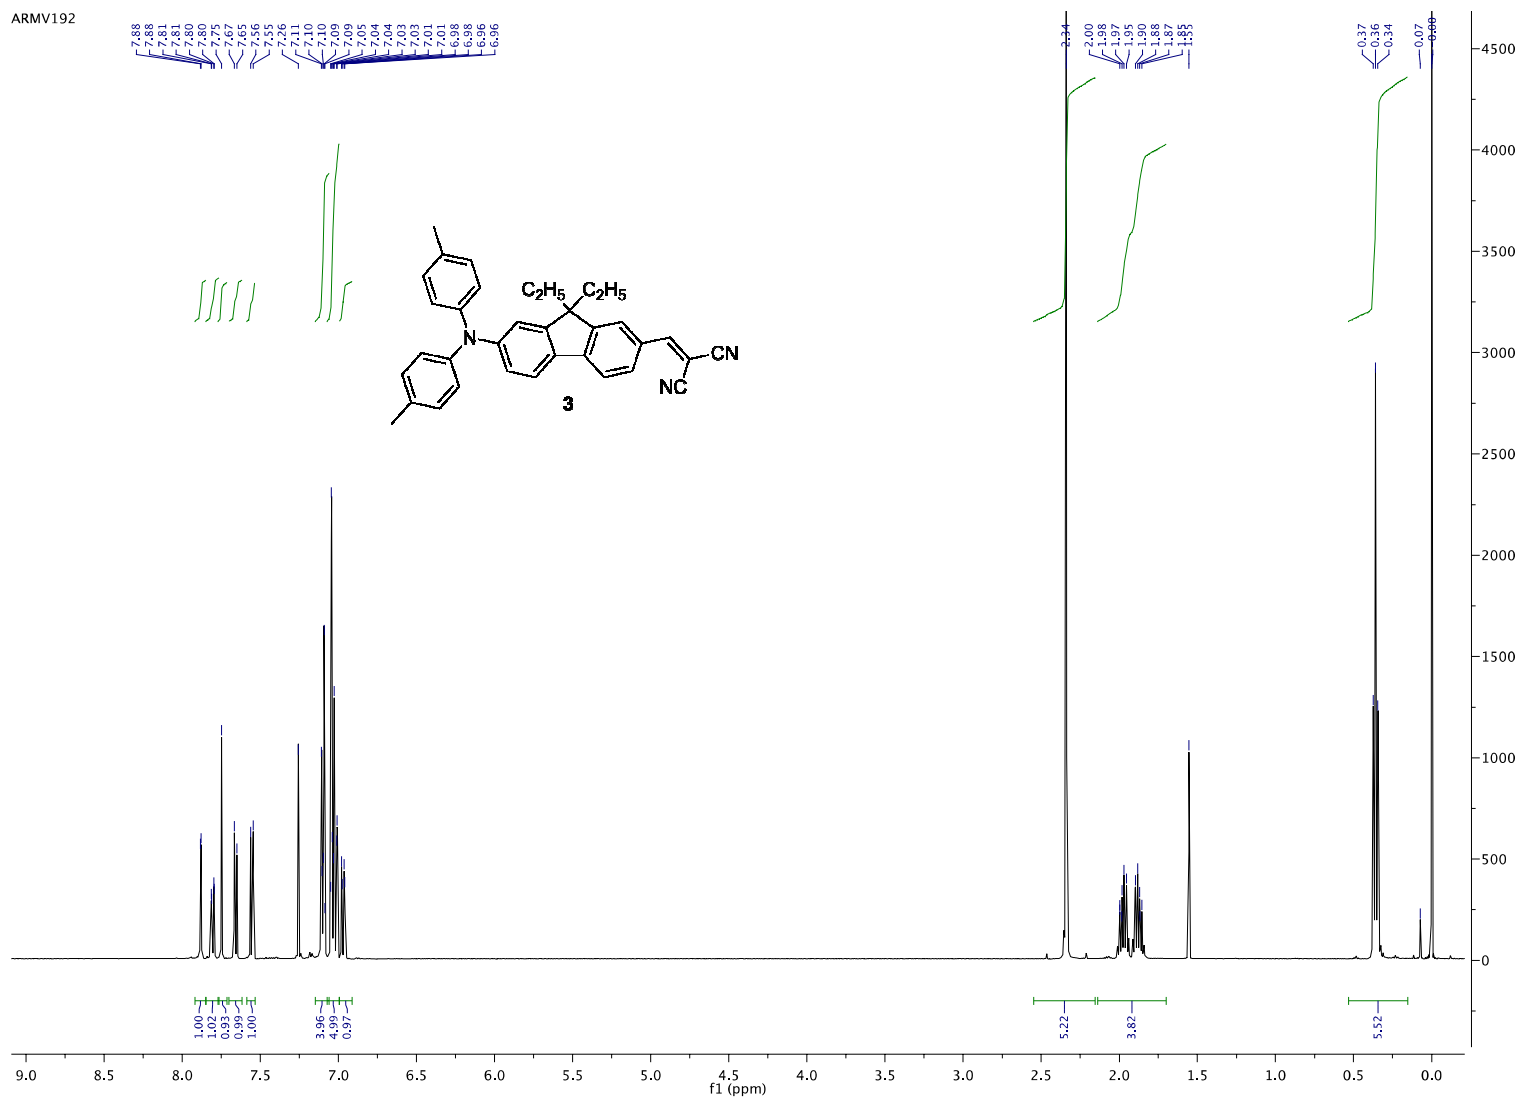

Figure S14.  $^1H$  NMR spectrum of compound 3.



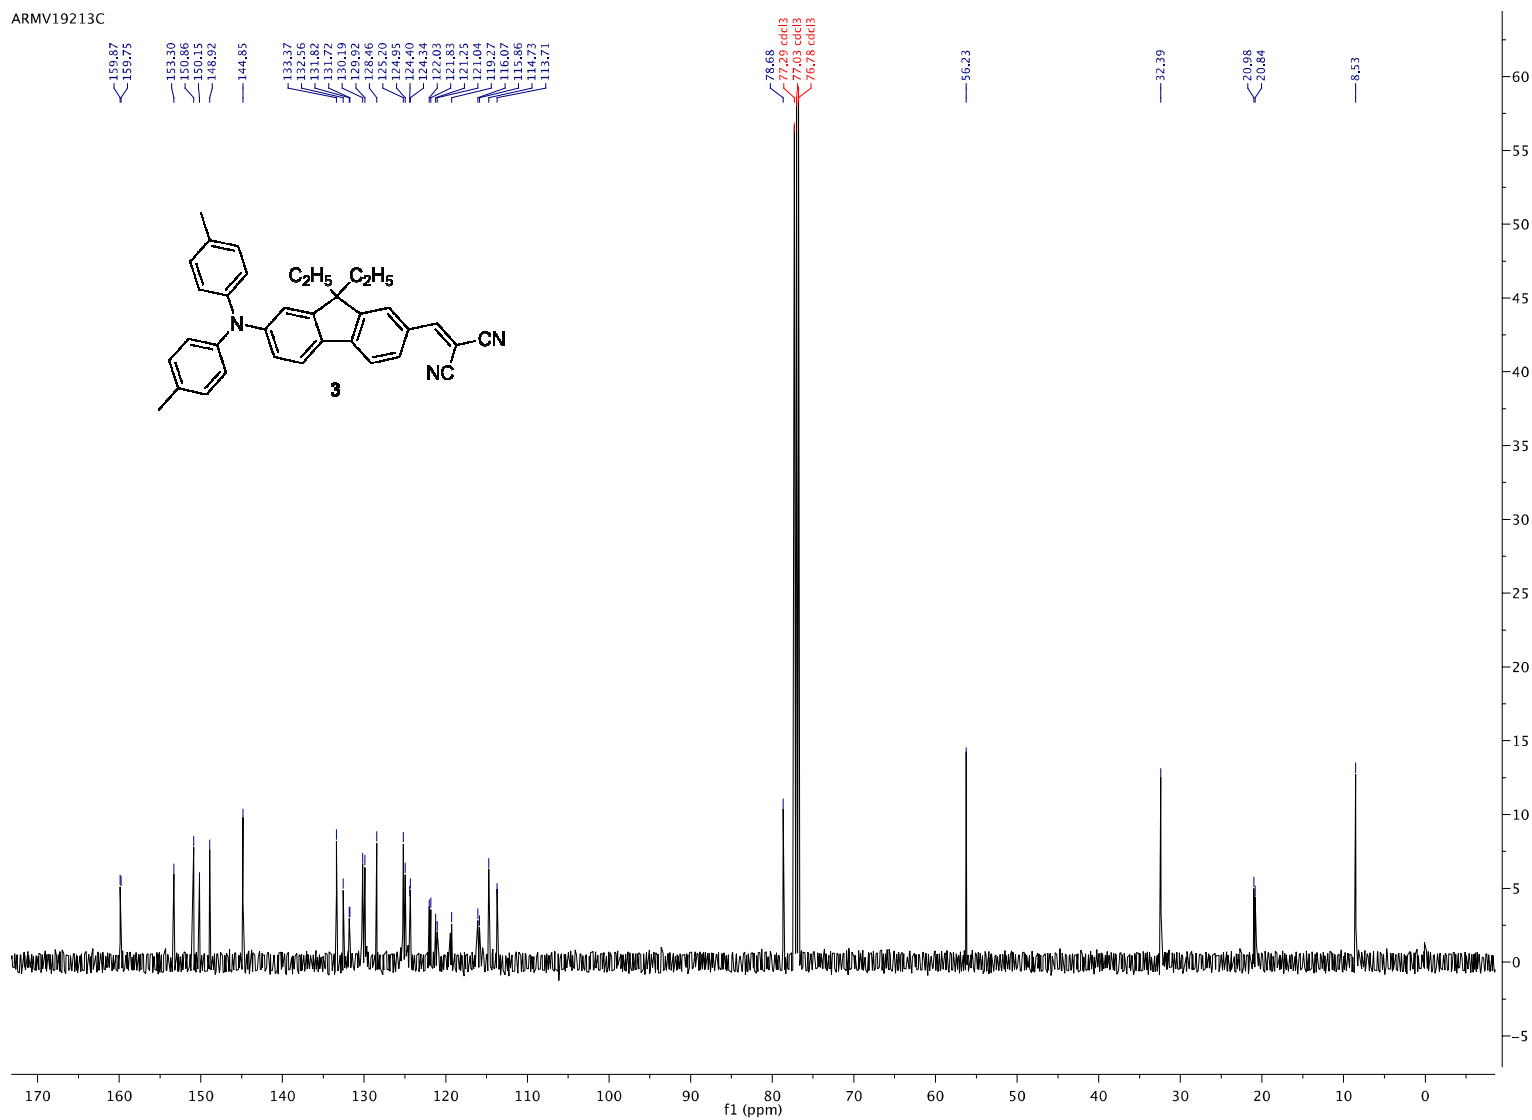

Figure S15.  $^{13}C$  NMR spectrum of compound **3**.

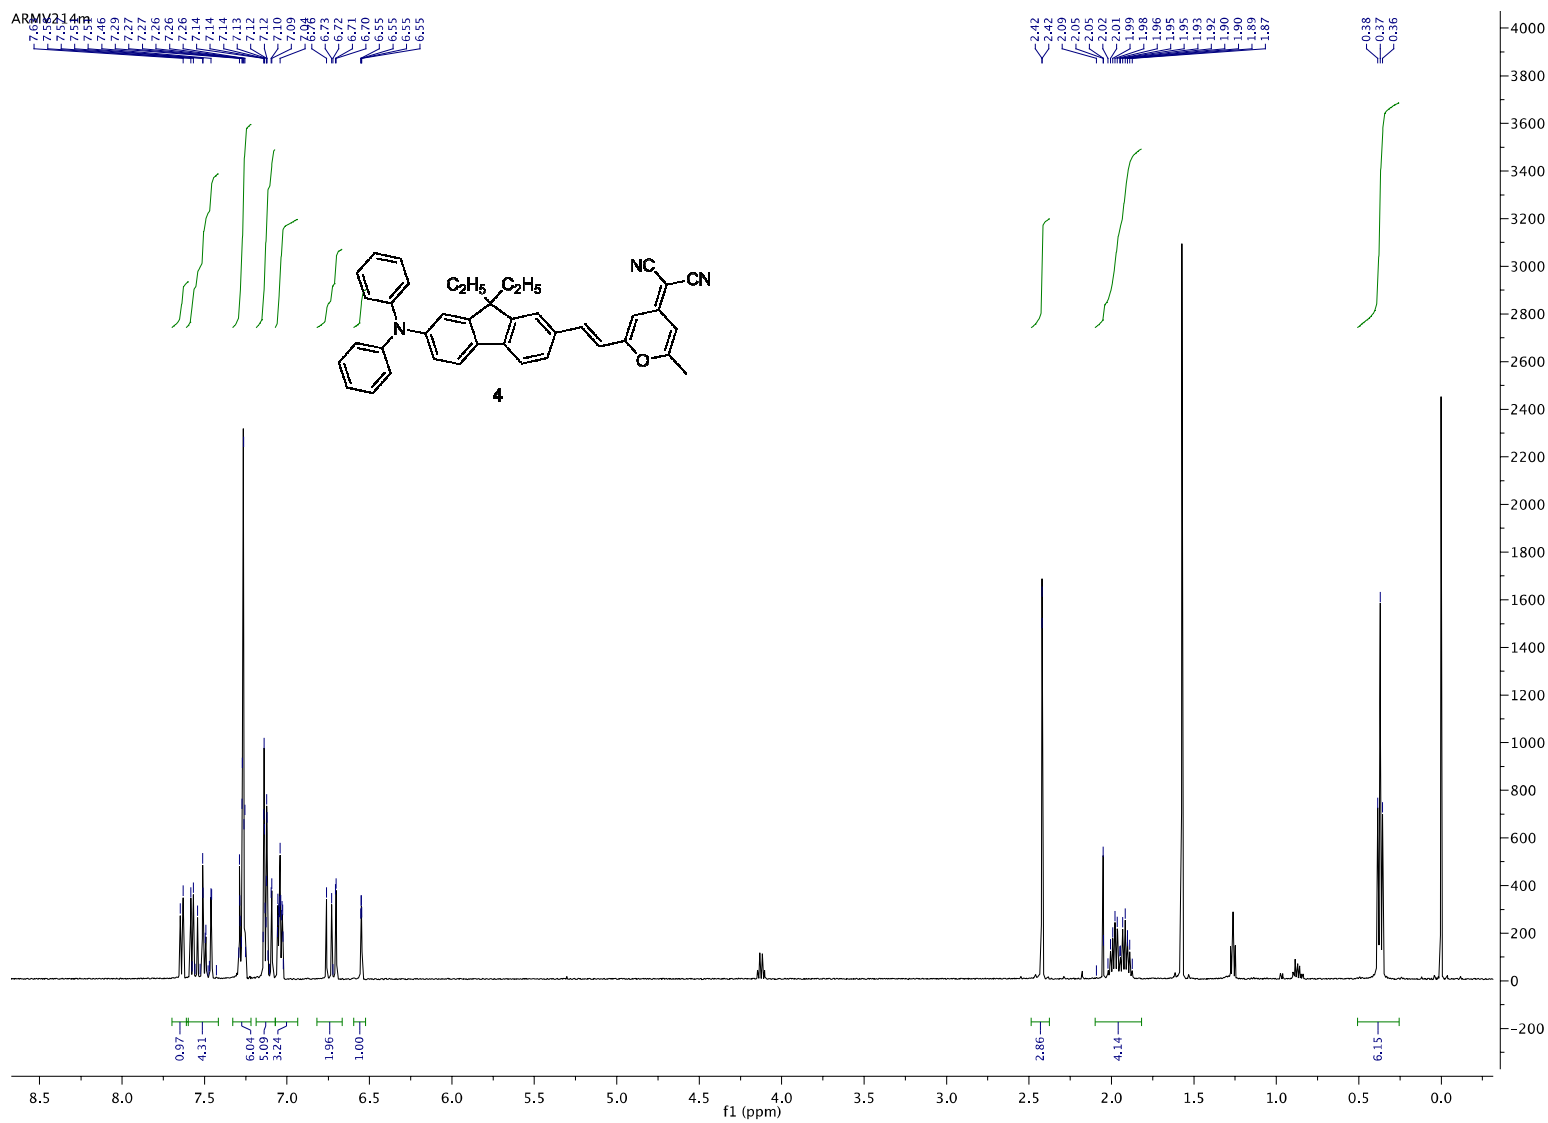

Figure S16. <sup>1</sup>H NMR spectrum of compound 4.

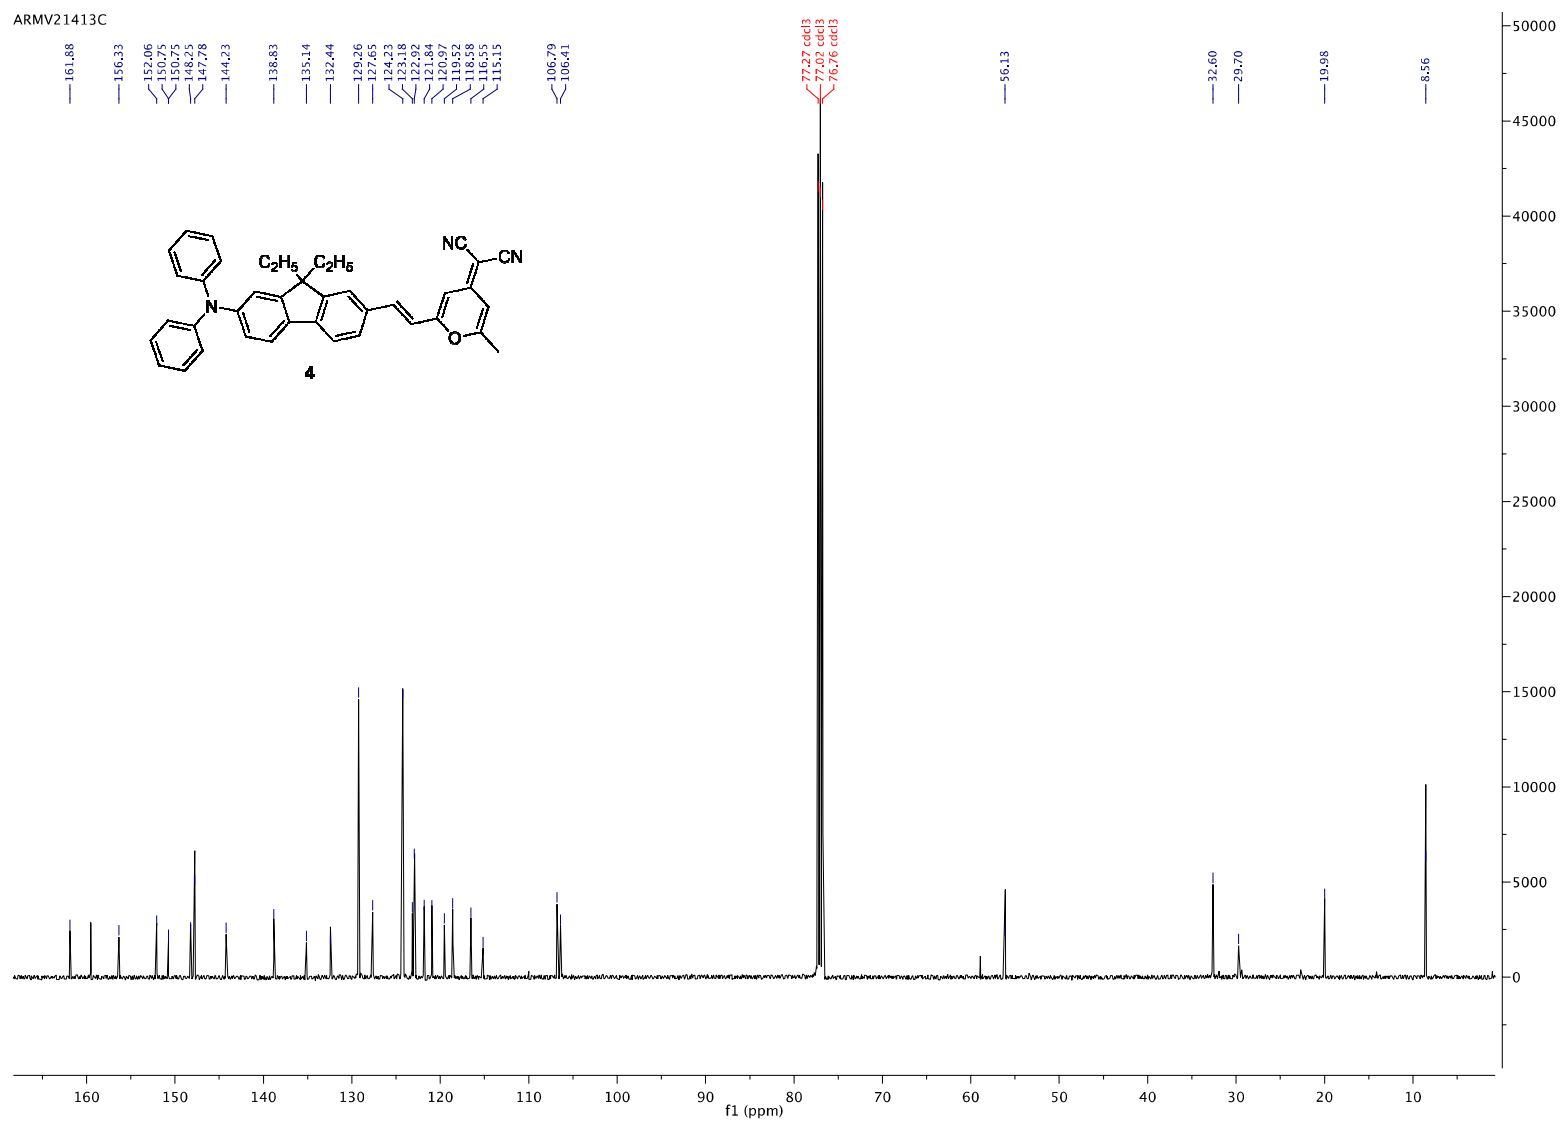

Figure S17.  $^{13}\text{C}$  NMR spectrum of compound 4.

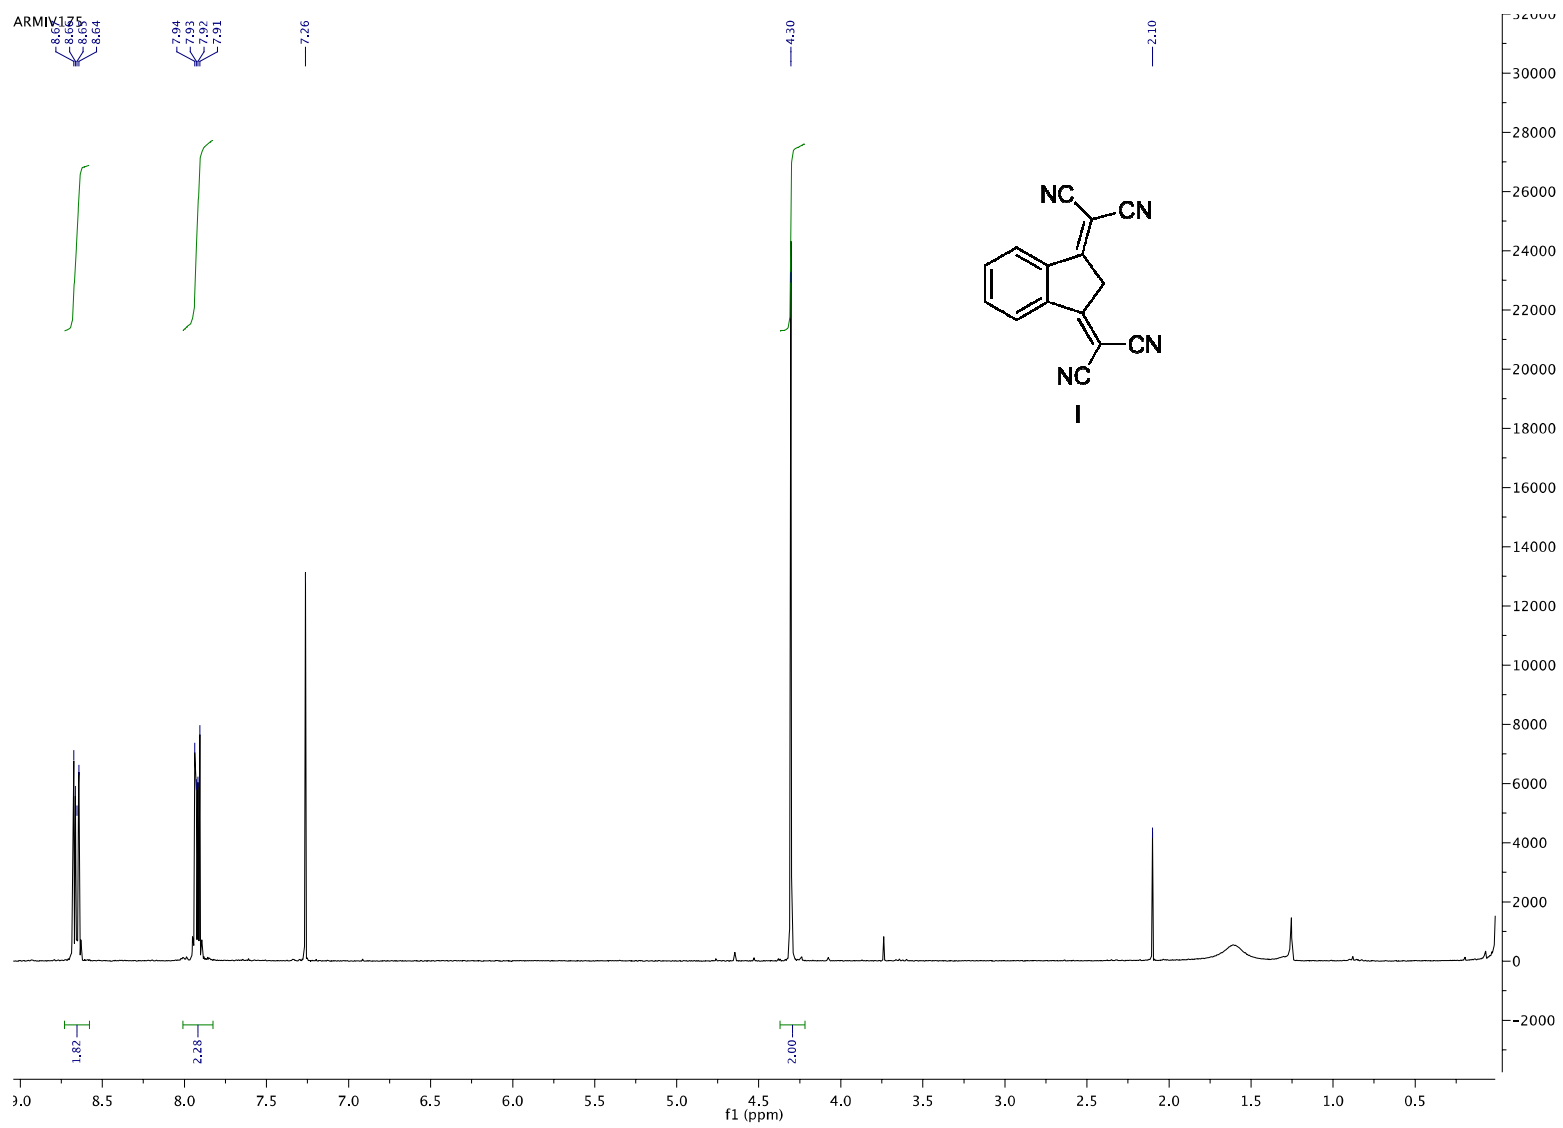

Figure S18.  $^1\text{H}$  NMR spectrum of compound I.

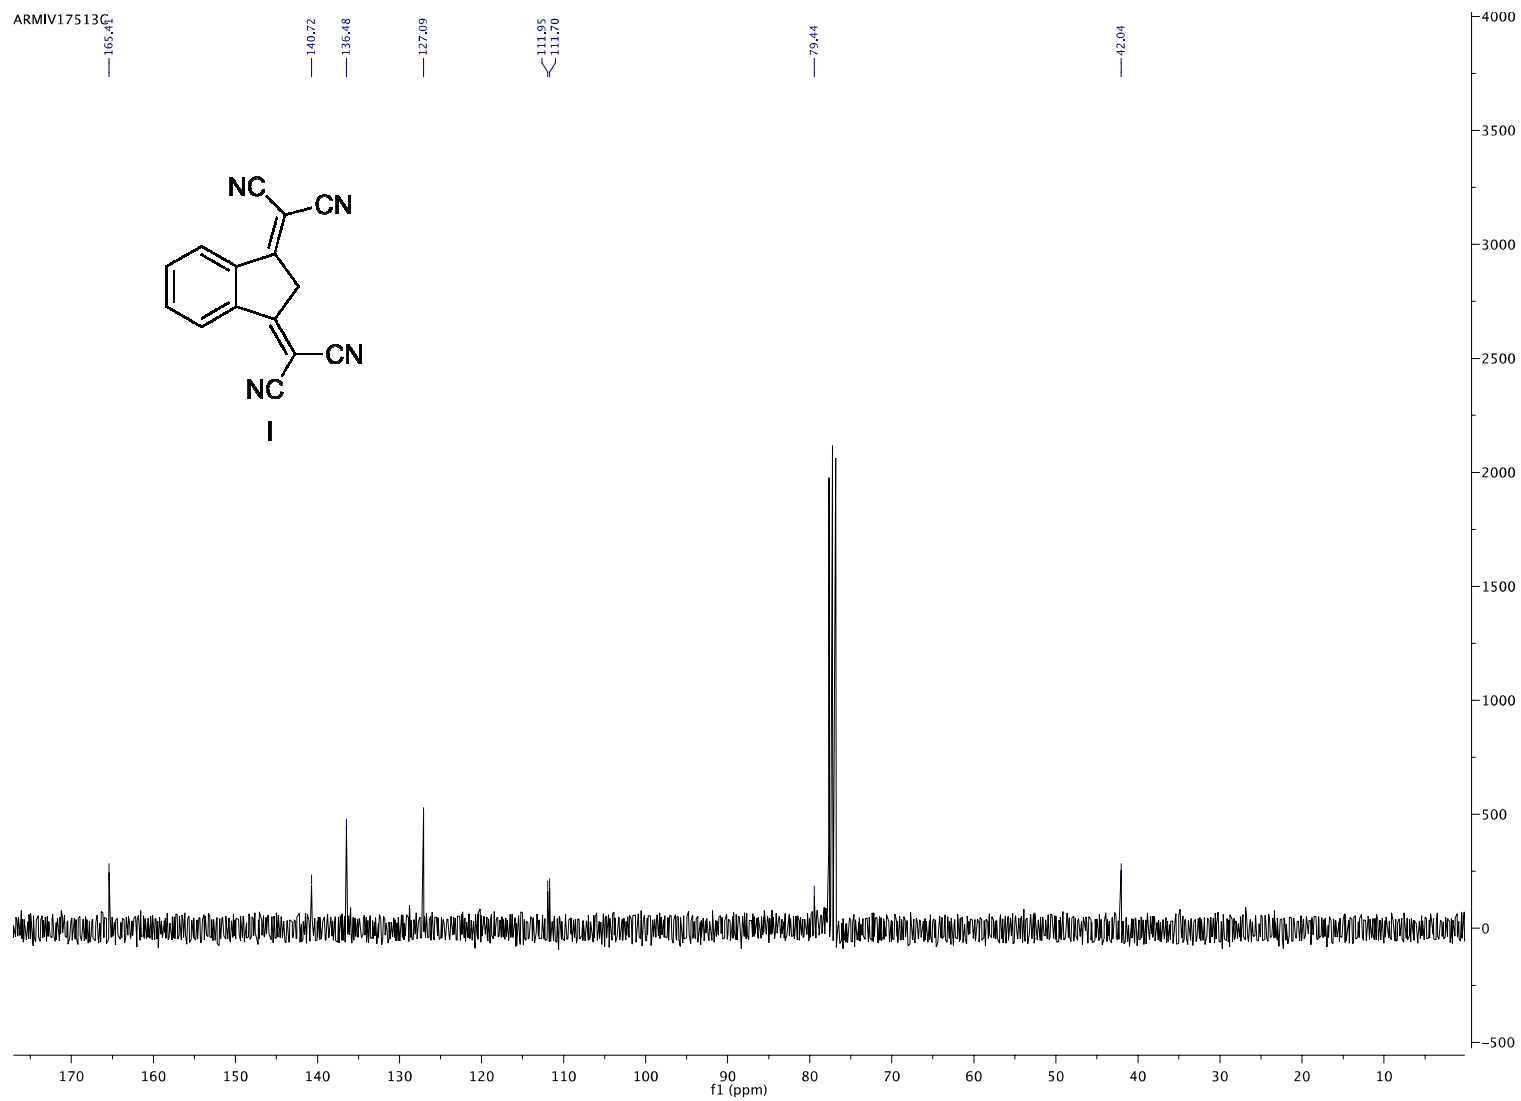

Figure S19.  $^{13}\text{C}$  NMR spectrum of compound I.

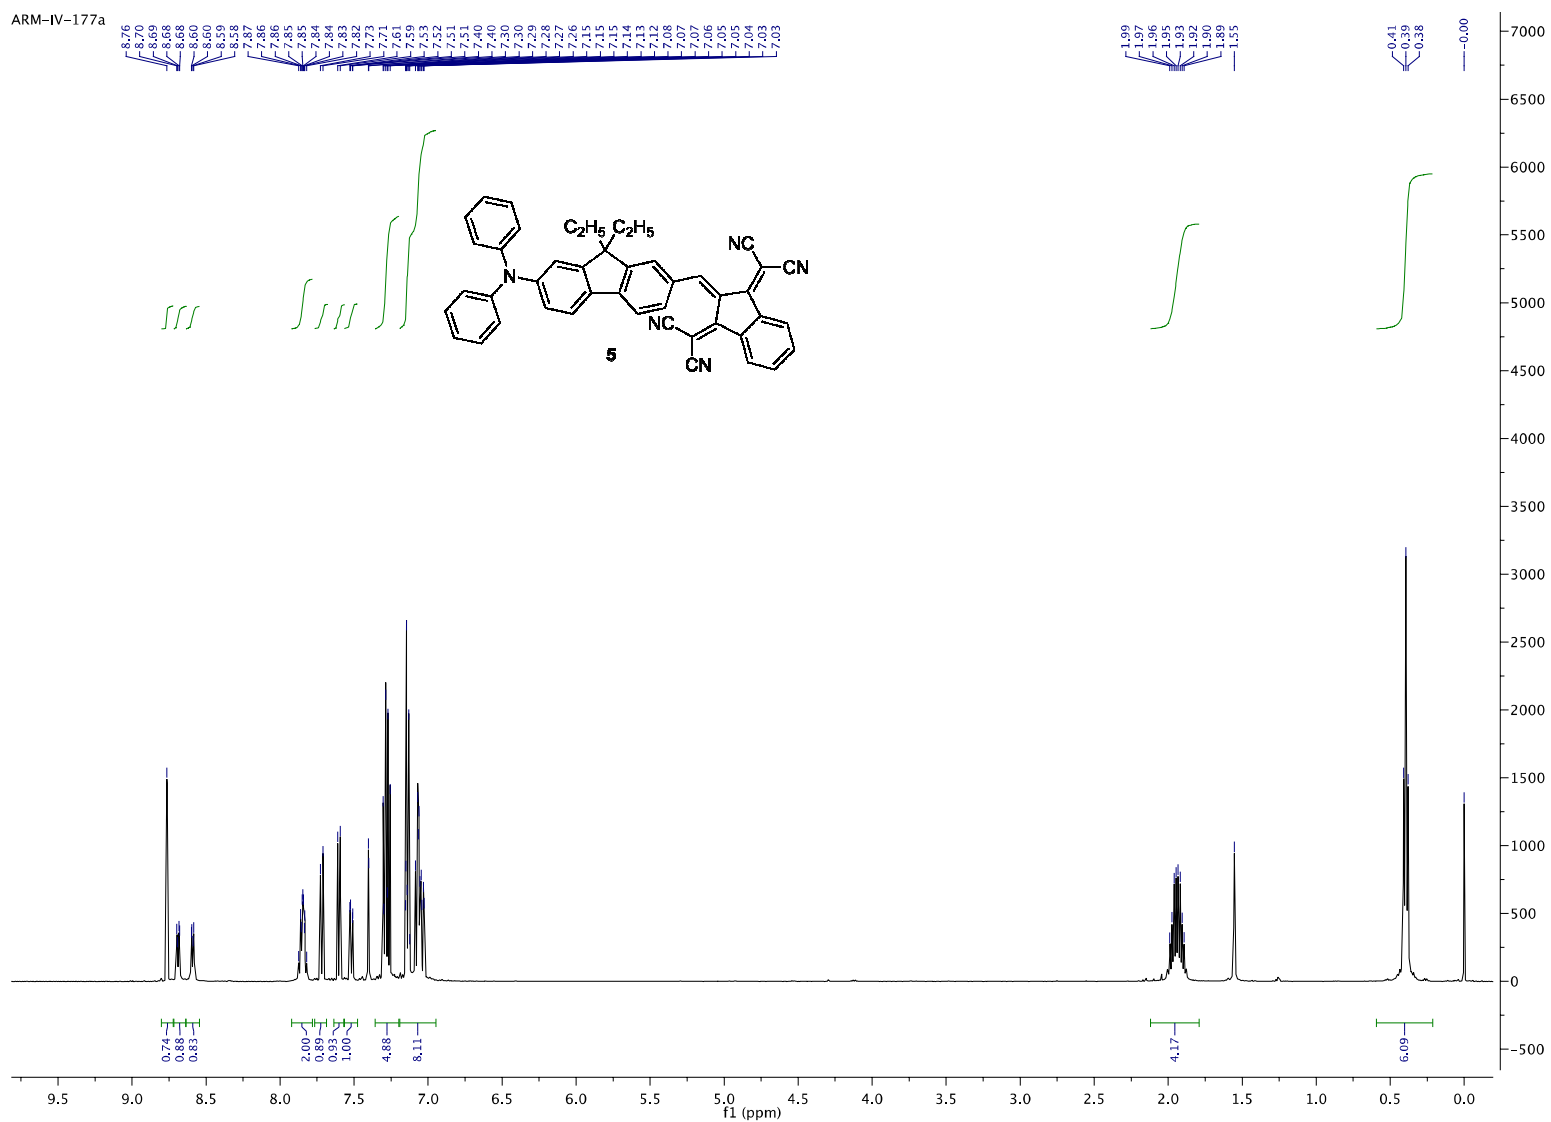

**Figure S20.**  $^1H$  NMR spectrum of compound **5**.

ARMIV17713C

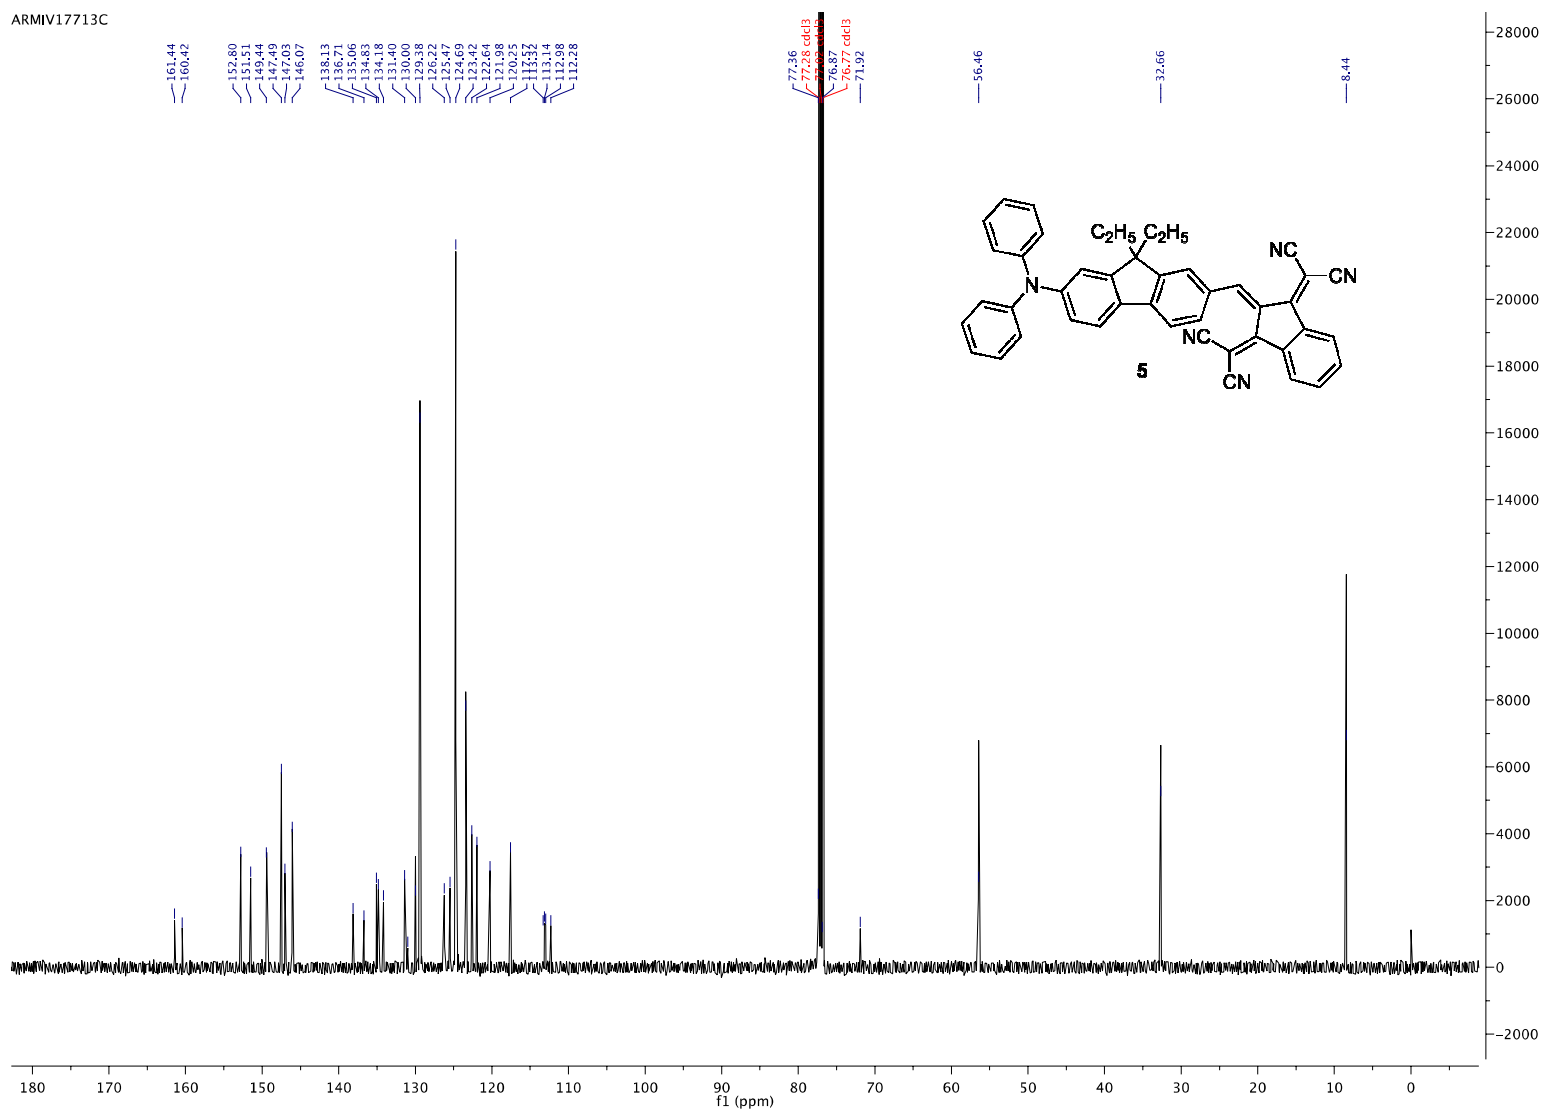

Figure S21.  $^{13}\text{C}$  NMR spectrum of compound 5.

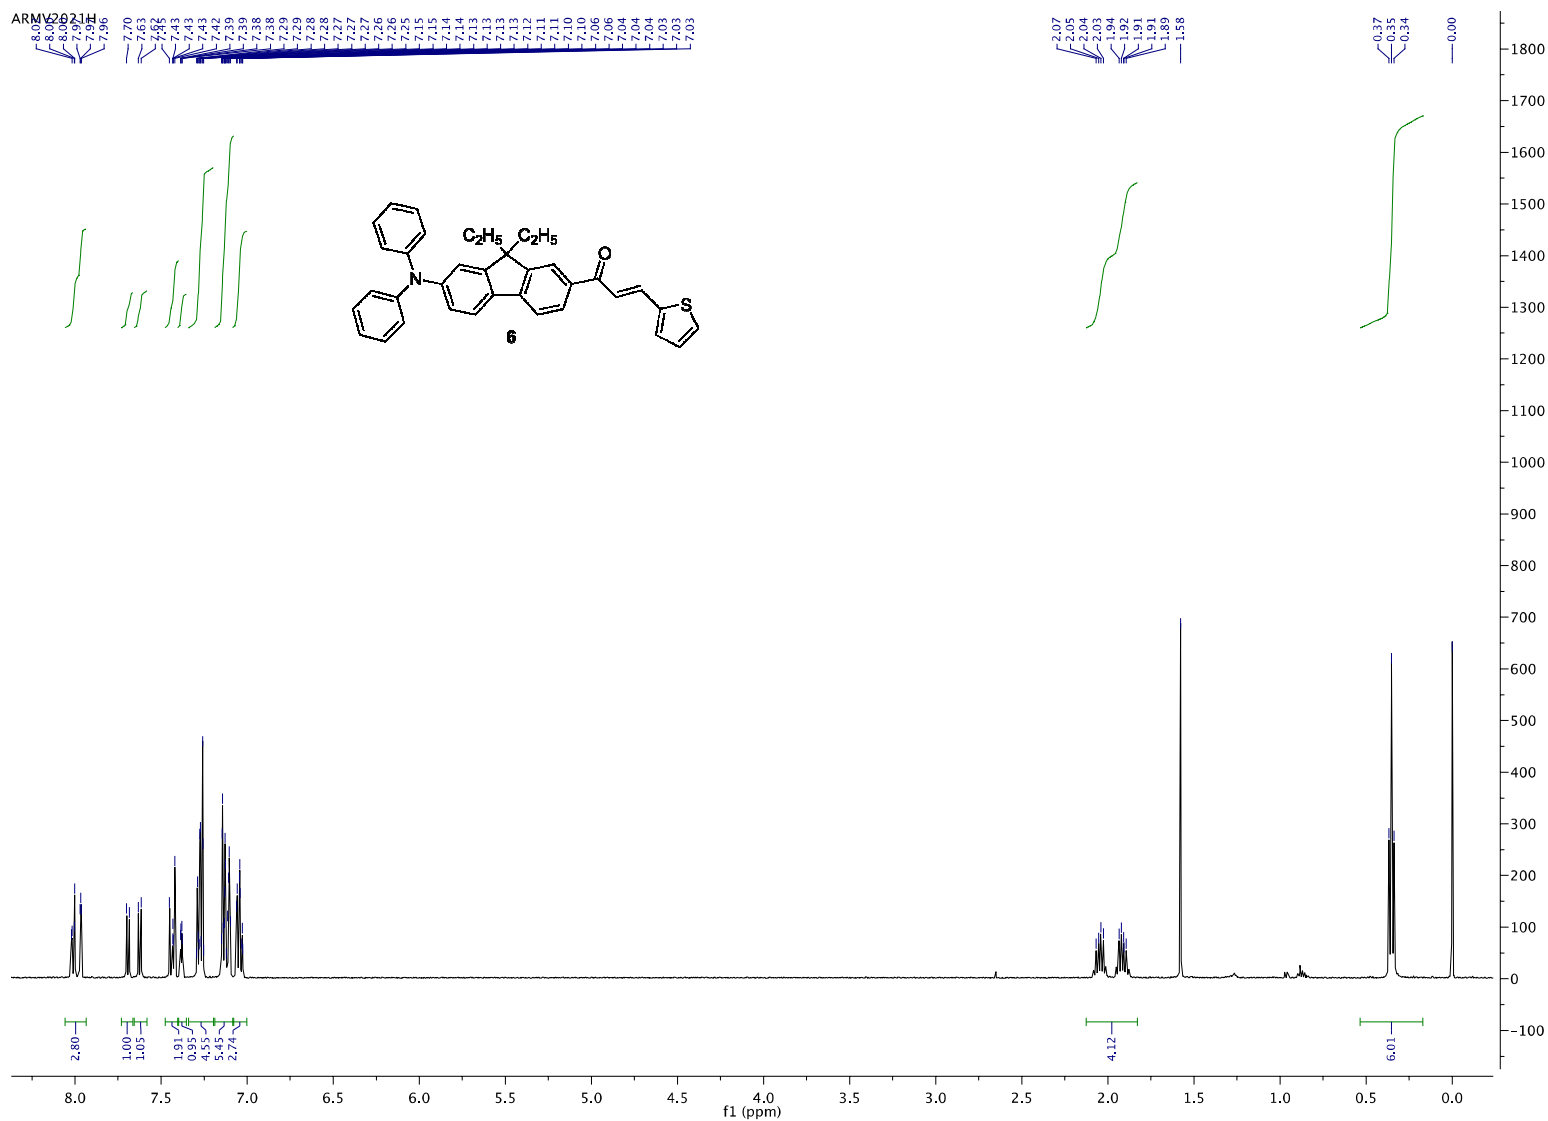

Figure S22. <sup>1</sup>H NMR spectrum of compound 6.



ARM-V-20213C

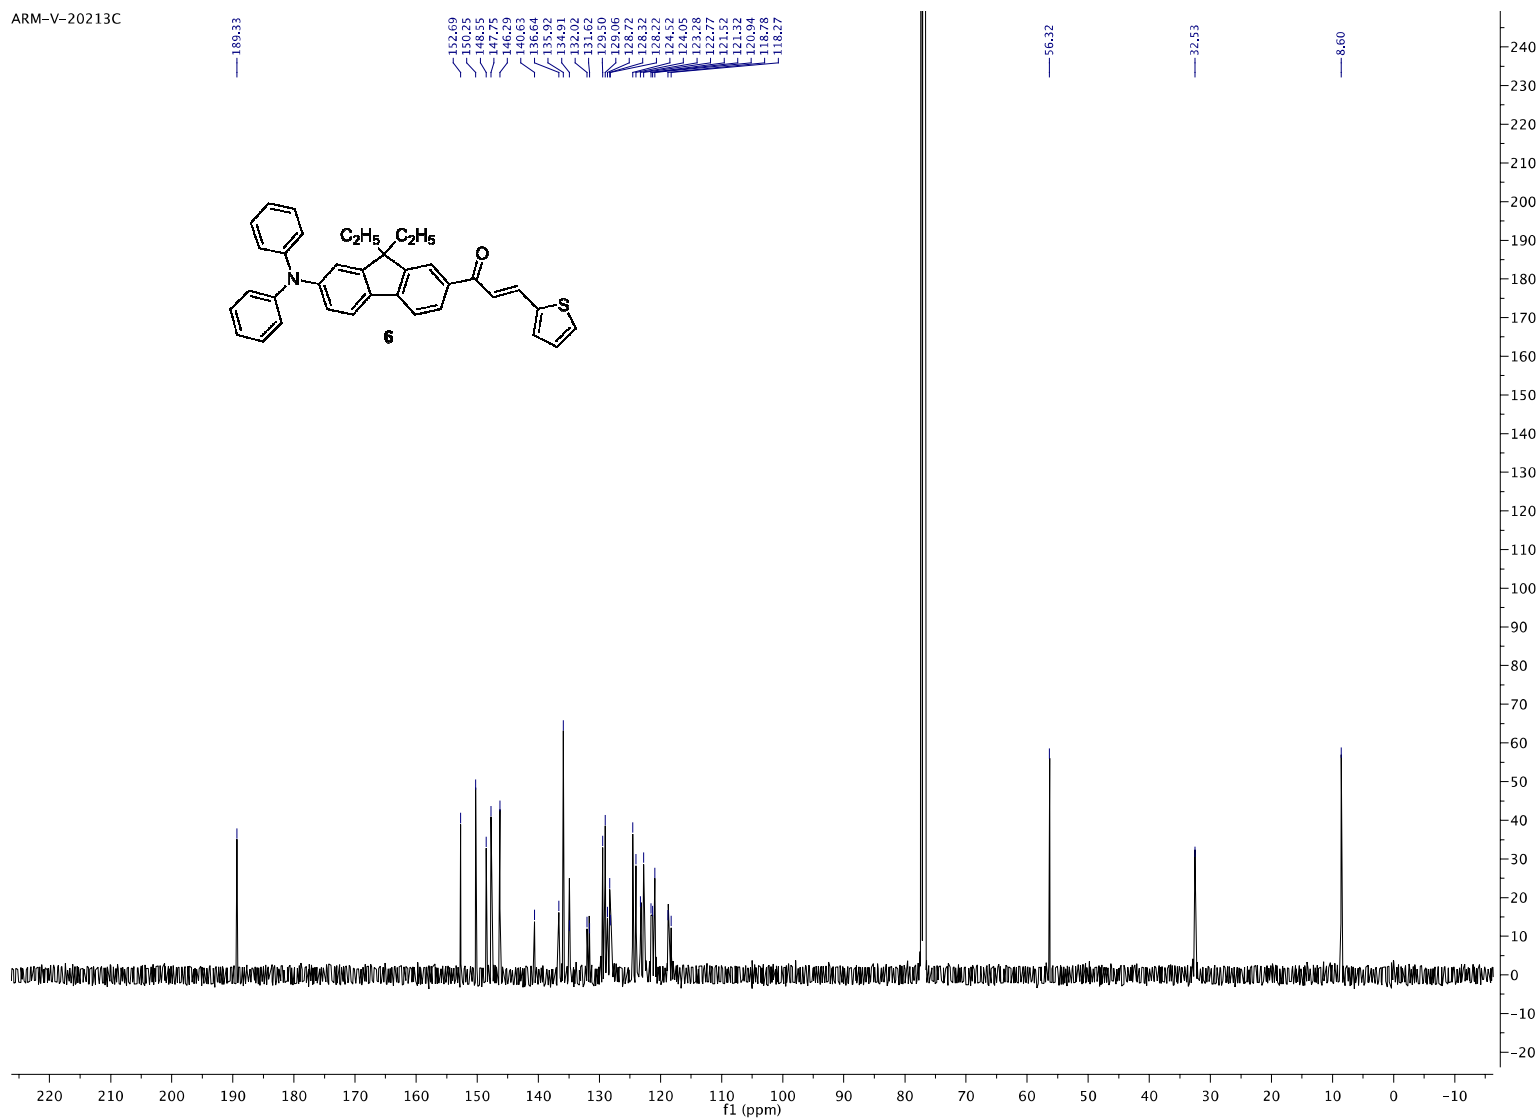

Figure S23.  $^{13}\text{C}$  NMR spectrum of compound 6.

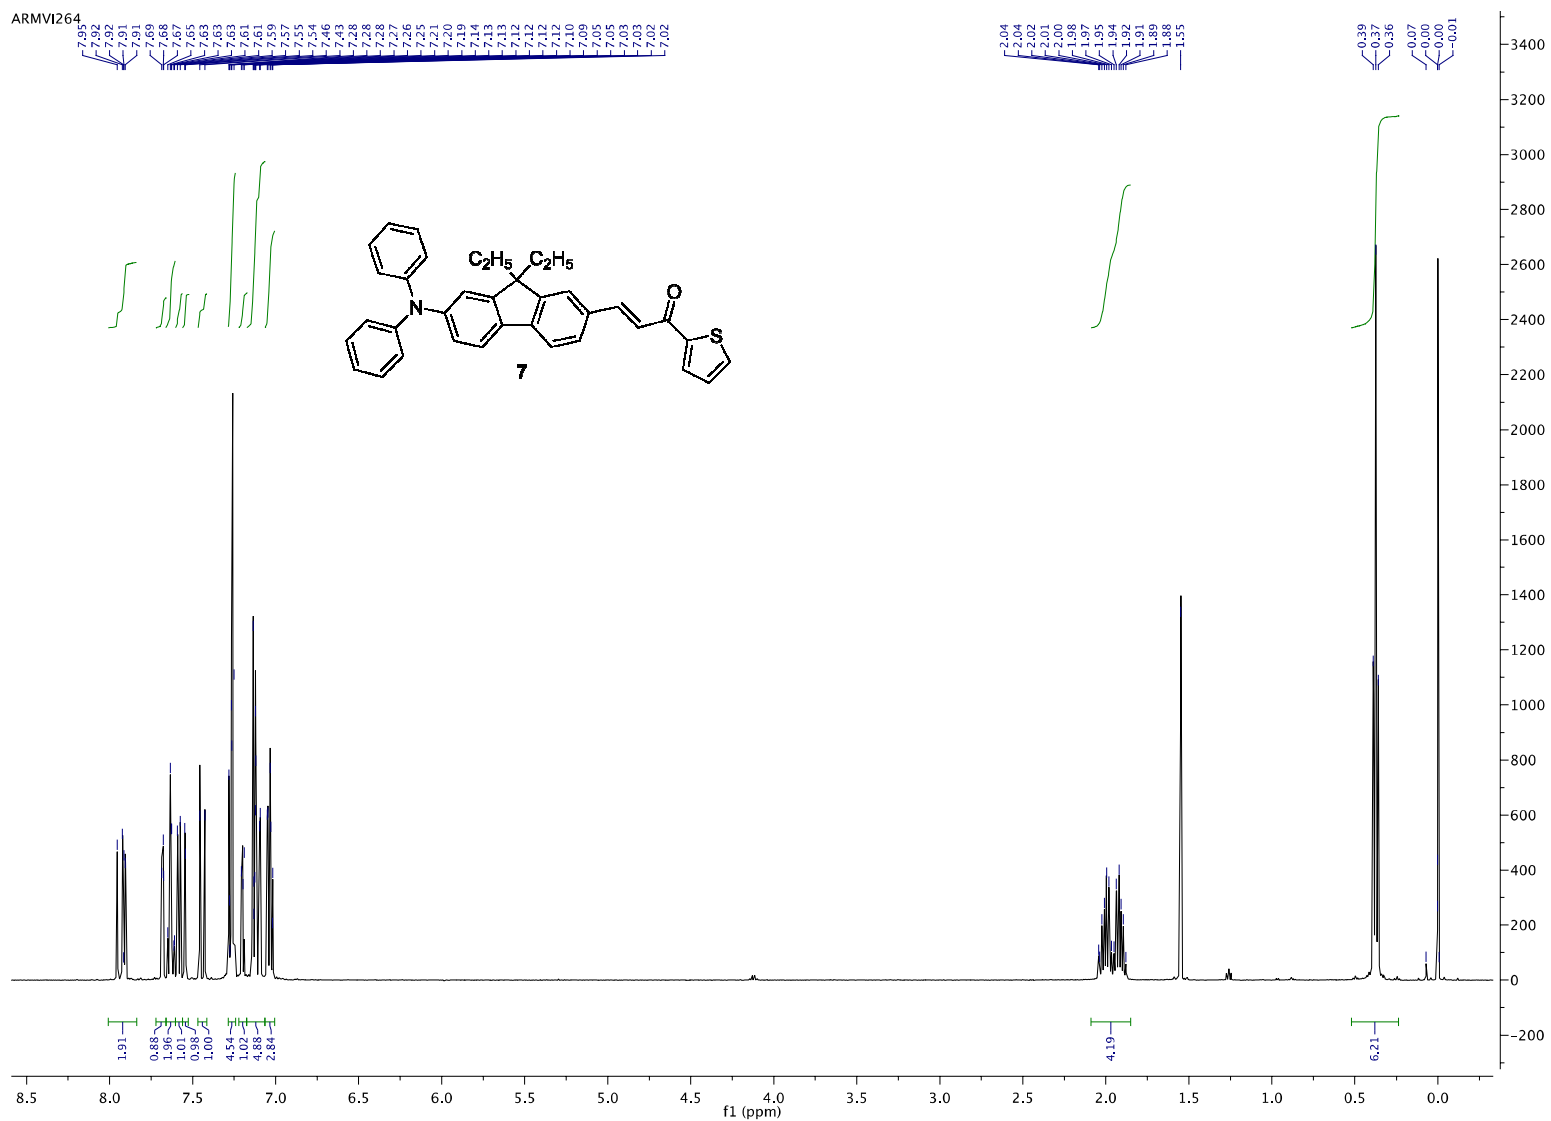

Figure S24. <sup>1</sup>H NMR spectrum of compound 7.

ARMVI264b13C

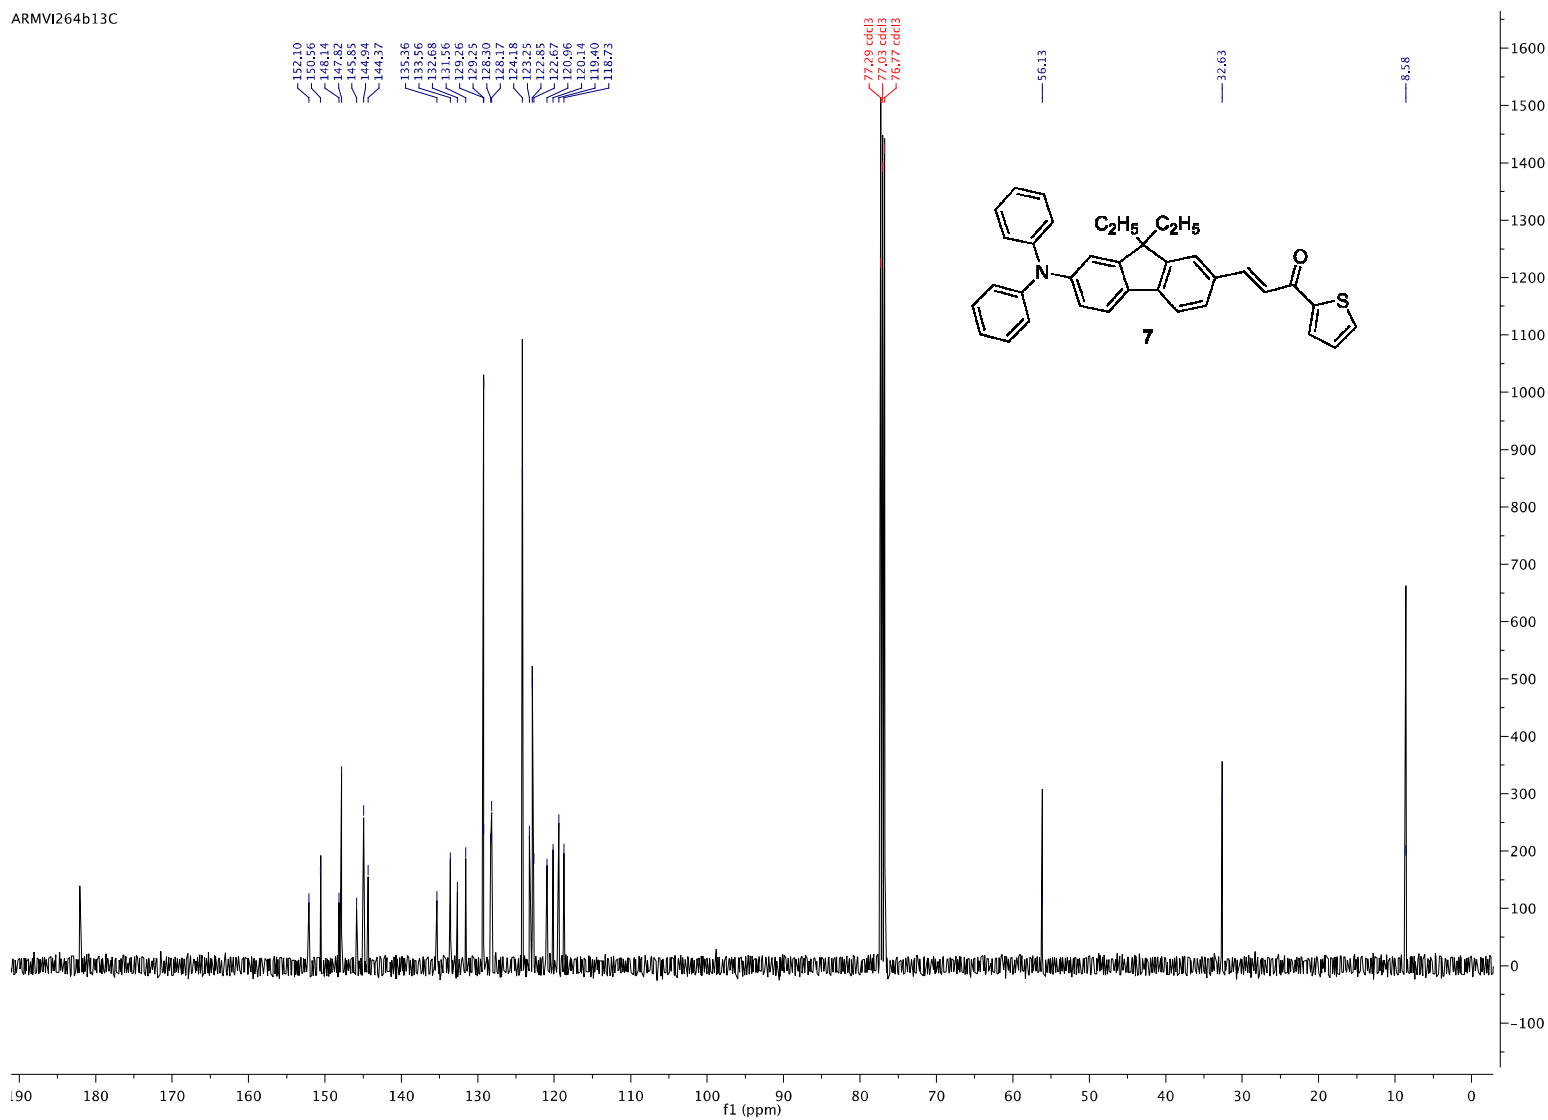

Figure S25. <sup>13</sup>C NMR spectrum of compound 7.
