# Supplementary material
Source: PubMed Central journal article supplement (PMC3562390)
Supplement: NIHMS435107-supplement-2_si_002.pdf [file NIHMS435107-supplement-2_si_002.pdf]

**Table S1.** Cartesian Coordinates /Å of the optimized ground state geometries of compounds 1-7 at B3LYP/6-311G\*\* level of theory in the gas phase.

| 1 |          |           |          | 2 |          |          |          |
|---|----------|-----------|----------|---|----------|----------|----------|
|   | x        | y         | z        |   | x        | y        | z        |
| N | 1.48011  | -0.00602  | -0.78326 | N | 0.45341  | 0.22928  | -0.11814 |
| N | -0.77596 | 3.23395   | -2.62331 | N | 2.22521  | 4.03706  | -0.98379 |
| C | 0.23326  | -4.96306  | -1.9335  | N | -8.78812 | -2.84367 | -1.16311 |
| C | -0.57267 | -3.8468   | -2.59548 | C | -4.20038 | -0.76    | -1.68617 |
| N | -0.61045 | -9.89409  | -2.7087  | C | -3.82876 | 0.62409  | -1.15719 |
| C | -0.43087 | -2.48544  | -2.4452  | C | -2.61811 | 1.28211  | -1.24538 |
| H | 0.33103  | -2.09257  | -1.78639 | H | -1.78862 | 0.82033  | -1.76494 |
| C | -1.28678 | -1.60626  | -3.15683 | C | -2.47311 | 2.57568  | -0.69614 |
| C | -2.27249 | -2.1634   | -4.00694 | C | -3.59296 | 3.17758  | -0.08421 |
| H | -2.92909 | -1.49386  | -4.55181 | H | -3.50447 | 4.16976  | 0.33941  |
| C | -2.41832 | -3.53212  | -4.15833 | C | -4.80659 | 2.51268  | 0.02139  |
| H | -3.18366 | -3.92775  | -4.81586 | H | -5.64333 | 2.99372  | 0.51496  |
| C | -1.56414 | -4.3837   | -3.45008 | C | -4.92938 | 1.2293   | -0.51681 |
| C | -1.47978 | -5.83448  | -3.40392 | C | -6.0625  | 0.31305  | -0.57441 |
| C | -2.2254  | -6.82552  | -4.04965 | C | -7.36992 | 0.42722  | -0.09635 |
| H | -3.02168 | -6.56563  | -4.73849 | H | -7.69454 | 1.31407  | 0.43691  |
| C | -1.92962 | -8.16001  | -3.81991 | C | -8.26056 | -0.61949 | -0.2888  |
| H | -2.49264 | -8.93146  | -4.32878 | H | -9.2705  | -0.54507 | 0.09339  |
| C | -0.89497 | -8.53386  | -2.93547 | C | -7.86904 | -1.78894 | -0.97086 |
| C | -0.1487  | -7.52978  | -2.28672 | C | -6.55086 | -1.89531 | -1.45463 |
| H | 0.64107  | -7.8122   | -1.60148 | H | -6.24917 | -2.79061 | -1.9847  |
| C | -0.43933 | -6.19904  | -2.52718 | C | -5.66142 | -0.85503 | -1.24964 |
| C | 1.74158  | -4.88833  | -2.30987 | C | -3.33029 | -1.87846 | -1.04224 |
| H | 2.15245  | -3.97553  | -1.86535 | H | -3.66583 | -2.83703 | -1.45322 |
| H | 2.24917  | -5.72291  | -1.81414 | H | -2.29924 | -1.74291 | -1.38566 |
| C | 2.06054  | -4.91533  | -3.80666 | C | -3.34892 | -1.94413 | 0.48671  |
| H | 1.60625  | -4.07131  | -4.33136 | H | -4.35806 | -2.11362 | 0.87044  |
| H | 1.70443  | -5.83484  | -4.27759 | H | -2.96644 | -1.02355 | 0.93328  |
| H | 3.14097  | -4.85835  | -3.96212 | H | -2.71638 | -2.76475 | 0.8344   |
| C | 0.11457  | -4.92086  | -0.38261 | C | -4.04659 | -0.8503  | -3.23174 |
| H | 0.70904  | -5.74874  | 0.01896  | H | -2.98067 | -0.75834 | -3.46777 |
| H | 0.60009  | -4.00266  | -0.03498 | H | -4.33709 | -1.86151 | -3.53686 |
| C | -1.30608 | -4.99298  | 0.18253  | C | -4.84048 | 0.17475  | -4.04539 |
| H | -1.80691 | -5.92068  | -0.10492 | H | -4.54877 | 1.19859  | -3.79847 |
| H | -1.9204  | -4.1578   | -0.16278 | H | -5.91502 | 0.08063  | -3.87103 |
| H | -1.27899 | -4.954    | 1.27452  | H | -4.66271 | 0.02775  | -5.11395 |
| C | 0.72458  | -10.31954 | -2.43701 | C | -8.34703 | -4.19879 | -1.12436 |
| C | 1.78333  | -9.90077  | -3.25244 | C | -7.51076 | -4.6452  | -0.09293 |
| H | 1.58244  | -9.25033  | -4.0952  | H | -7.20226 | -3.95268 | 0.68088  |
| C | 3.08252  | -10.31988 | -2.98273 | C | -7.08149 | -5.96842 | -0.06184 |
| H | 3.89296  | -9.98901  | -3.62241 | H | -6.43478 | -6.29965 | 0.74291  |
| C | 3.34146  | -11.1735  | -1.91096 | C | -7.49202 | -6.86853 | -1.04447 |
| H | 4.35337  | -11.50356 | -1.70744 | H | -7.16145 | -7.90009 | -1.01361 |

|                               |                               |
|-------------------------------|-------------------------------|
| C 2.28711 -11.60085 -1.10555  | C -8.33336 -6.42931 -2.06545  |
| H 2.47662 -12.26194 -0.26742  | H -8.65636 -7.11828 -2.83785  |
| C 0.987 -11.17336 -1.35922    | C -8.75375 -5.10339 -2.11305  |
| H 0.17047 -11.49969 -0.72652  | H -9.39945 -4.76313 -2.91353  |
| C -1.64921 -10.87094 -2.72705 | C -10.16468 -2.57128 -1.40728 |
| C -1.46663 -12.07914 -3.41108 | C -10.54507 -1.57404 -2.31521 |
| H -0.53658 -12.25902 -3.93648 | H -9.78271 -1.00669 -2.83504  |
| C -2.47162 -13.04171 -3.41295 | C -11.89209 -1.31483 -2.54825 |
| H -2.31622 -13.97257 -3.94667 | H -12.17043 -0.54049 -3.25442 |
| C -3.67468 -12.8096 -2.74816  | C -12.87862 -2.05394 -1.89677 |
| H -4.45748 -13.55893 -2.75606 | H -13.92678 -1.85418 -2.08597 |
| C -3.8604 -11.60537 -2.07046  | C -12.50272 -3.05376 -1.00102 |
| H -4.78767 -11.41674 -1.54115 | H -13.25953 -3.63295 -0.48389 |
| C -2.85434 -10.64435 -2.04984 | C -11.158 -3.30839 -0.74957   |
| H -2.99698 -9.71654 -1.50926  | H -10.87084 -4.07945 -0.04507 |
| C -1.23658 -0.16889 -3.08502  | C -1.20761 3.31549 -0.78394   |
| H -1.97533 0.33525 -3.70058   | C -1.28472 4.80895 -0.9603    |
| C -0.42648 0.68417 -2.38144   | H -1.60589 5.28027 -0.0255    |
| C 0.62368 0.29118 -1.50133    | H -2.02162 5.06601 -1.72338   |
| C -0.61826 2.09381 -2.51399   | H -0.32343 5.24206 -1.23047   |
|                               | C 0.02316 2.71098 -0.69826    |
|                               | C 0.2289 1.3315 -0.38482      |
|                               | C 1.23522 3.45353 -0.8571     |
| <b>3</b>                      | <b>4</b>                      |
| N 1.64178 0.02422 -0.99251    | N 5.79608 -0.19954 -0.07664   |
| N -0.76668 3.25876 -2.63875   | C 4.42164 -0.51848 -0.17165   |
| C 0.28531 -4.93684 -1.99701   | C 6.25799 1.09956 -0.43517    |
| C -0.57425 -3.82197 -2.59052  | C 6.73139 -1.16689 0.38861    |
| N -0.62764 -9.86819 -2.67274  | C 7.96107 -1.33286 -0.26267   |
| C -0.41761 -2.46057 -2.46014  | C 8.88093 -2.26819 0.20214    |
| H 0.40022 -2.06606 -1.87325   | C 8.58584 -3.06218 1.30976    |
| C -1.33181 -1.5825 -3.09766   | C 7.36014 -2.90377 1.95583    |
| C -2.39005 -2.14225 -3.85411  | C 6.44154 -1.95932 1.50776    |
| H -3.09136 -1.47397 -4.34192  | C 7.15934 1.78427 0.39037     |
| C -2.55086 -3.51114 -3.98534  | C 7.61847 3.04829 0.03115     |
| H -3.37211 -3.90832 -4.57053  | C 7.1762 3.65471 -1.14396     |
| C -1.63847 -4.36173 -3.35157  | C 6.27443 2.97769 -1.96466    |
| C -1.55215 -5.81132 -3.30634  | C 5.82361 1.70664 -1.62113    |
| C -2.35212 -6.80543 -3.87892  | C 4.01691 -1.80193 -0.5871    |
| H -3.20593 -6.54815 -4.49623  | C 2.67132 -2.13257 -0.67854   |
| C -2.03911 -8.13882 -3.66989  | C 1.70592 -1.17224 -0.36685   |
| H -2.64598 -8.91098 -4.12395  | C 2.10332 0.11574 0.0402      |
| C -0.92948 -8.51218 -2.87869  | C 3.44387 0.44356 0.14553     |
| C -0.12804 -7.50377 -2.30382  | C 0.24792 -1.22951 -0.37176   |
| H 0.71945 -7.78274 -1.69018   | C -0.25264 0.02286 0.03604    |
| C -0.43868 -6.17447 -2.52332  | C 0.88826 0.994 0.33464       |

|   |          |           |          |   |           |          |          |
|---|----------|-----------|----------|---|-----------|----------|----------|
| C | 1.75462  | -4.86649  | -2.5051  | C | -0.63341  | -2.26854 | -0.69521 |
| H | 2.20443  | -3.95223  | -2.10323 | C | -1.99951  | -2.05046 | -0.6106  |
| H | 2.30273  | -5.6997   | -2.05197 | C | -2.51993  | -0.80274 | -0.20344 |
| C | 1.94017  | -4.90155  | -4.02406 | C | -1.61584  | 0.23368  | 0.12034  |
| H | 1.44225  | -4.05939  | -4.5108  | C | -3.9434   | -0.53034 | -0.09984 |
| H | 1.5425   | -5.8228   | -4.45675 | C | -4.9617   | -1.38033 | -0.36108 |
| H | 3.00272  | -4.84715  | -4.27479 | C | -6.36428  | -1.05788 | -0.24011 |
| C | 0.30372  | -4.88743  | -0.44199 | O | -7.14789  | -2.12241 | -0.59215 |
| H | 0.93004  | -5.71461  | -0.09047 | C | -8.50338  | -2.03028 | -0.54957 |
| H | 0.81895  | -3.96842  | -0.14249 | C | -9.11863  | -0.89144 | -0.16057 |
| C | -1.06189 | -4.95492  | 0.24606  | C | -8.35278  | 0.26208  | 0.22223  |
| H | -1.58688 | -5.88313  | 0.00762  | C | -6.93833  | 0.11533  | 0.16159  |
| H | -1.70314 | -4.12033  | -0.04791 | C | -9.16392  | -3.29638 | -0.971   |
| H | -0.93911 | -4.91117  | 1.33133  | C | -8.9655   | 1.45638  | 0.63003  |
| C | 0.72032  | -10.29035 | -2.45894 | C | -10.37493 | 1.58075  | 0.68377  |
| C | 1.73945  | -9.89909  | -3.33436 | N | -11.53025 | 1.66959  | 0.72329  |
| H | 1.50204  | -9.26813  | -4.18271 | C | 0.85293   | 1.96693  | -2.09451 |
| C | 3.04738  | -10.32074 | -3.12228 | C | 0.8428    | 2.24522  | -0.58938 |
| H | 3.8214   | -10.00841 | -3.81604 | C | 0.91235   | 0.38253  | 2.87898  |
| C | 3.38037  | -11.1546  | -2.04849 | C | 0.86434   | 1.47963  | 1.81265  |
| C | 2.34958  | -11.5517  | -1.19062 | C | -8.19641  | 2.58527  | 1.00348  |
| H | 2.57411  | -12.20143 | -0.35086 | N | -7.5505   | 3.49948  | 1.30539  |
| C | 1.03975  | -11.12343 | -1.38257 | H | 8.19124   | -0.72691 | -1.13054 |
| H | 0.25834  | -11.43978 | -0.70193 | H | 9.82782   | -2.38431 | -0.31321 |
| C | -1.65823 | -10.85571 | -2.65228 | H | 9.3018    | -3.79377 | 1.66546  |
| C | -1.51263 | -12.04421 | -3.37508 | H | 7.12099   | -3.50823 | 2.82367  |
| H | -0.61686 | -12.20512 | -3.96292 | H | 5.49733   | -1.83114 | 2.02284  |
| C | -2.5049  | -13.01816 | -3.33344 | H | 7.49722   | 1.32233  | 1.31009  |
| H | -2.36812 | -13.93431 | -3.89895 | H | 8.31575   | 3.56554  | 0.68067  |
| C | -3.67527 | -12.83679 | -2.58915 | H | 7.53081   | 4.64148  | -1.41762 |
| C | -3.80934 | -11.64324 | -1.87102 | H | 5.92976   | 3.4337   | -2.88603 |
| H | -4.69809 | -11.47848 | -1.27019 | H | 5.13554   | 1.17829  | -2.2699  |
| C | -2.81749 | -10.66878 | -1.89076 | H | 4.77041   | -2.53636 | -0.8416  |
| H | -2.93695 | -9.76054  | -1.31217 | H | 2.38609   | -3.12668 | -1.00463 |
| C | -1.27272 | -0.14571  | -3.0382  | H | 3.75299   | 1.42914  | 0.47249  |
| H | -2.06299 | 0.3571    | -3.58733 | H | -0.2599   | -3.23675 | -1.00933 |
| C | -0.40062 | 0.70974   | -2.41512 | H | -2.67447  | -2.8592  | -0.86341 |
| C | 0.72418  | 0.31932   | -1.63169 | H | -2.00952  | 1.19525  | 0.43488  |
| C | -0.6014  | 2.11885   | -2.53767 | H | -4.18346  | 0.47818  | 0.22616  |
| C | 4.80607  | -11.59013 | -1.81263 | H | -4.7711   | -2.39469 | -0.69168 |
| H | 5.34479  | -10.85893 | -1.19979 | H | -10.19916 | -0.86367 | -0.14205 |
| H | 4.8489   | -12.54834 | -1.29026 | H | -6.29987  | 0.94247  | 0.43744  |
| H | 5.35258  | -11.69116 | -2.75322 | H | -10.24719 | -3.19562 | -0.92892 |
| C | -4.76558 | -13.88038 | -2.57927 | H | -8.85556  | -4.1184  | -0.31915 |
| H | -5.31198 | -13.87659 | -1.63326 | H | -8.86811  | -3.55496 | -1.99148 |
| H | -5.49378 | -13.69709 | -3.3772  | H | 0.82054   | 2.90689  | -2.65173 |
| H | -4.3594  | -14.88265 | -2.73272 | H | 1.75591   | 1.43151  | -2.39786 |
|   |          |           |          | H | -0.01015  | 1.37018  | -2.39971 |
|   |          |           |          | H | -0.05321  | 2.82016  | -0.33078 |
|   |          |           |          | H | 1.69678   | 2.88076  | -0.33098 |

|  |   |          |          |         |
|--|---|----------|----------|---------|
|  | H | 0.88736  | 0.82637  | 3.87769 |
|  | H | 0.06045  | -0.29692 | 2.79627 |
|  | H | 1.82573  | -0.21239 | 2.80237 |
|  | H | 1.70988  | 2.16177  | 1.95345 |
|  | H | -0.03903 | 2.08368  | 1.95138 |

| 5 |          |          |          | 6 |          |           |          |
|---|----------|----------|----------|---|----------|-----------|----------|
| N | -8.76718 | -2.9781  | -1.45438 | S | -0.05758 | 0.41353   | 0.03025  |
| C | -4.2988  | -0.62107 | -1.77426 | O | -4.94568 | -1.90919  | -0.77501 |
| C | -4.01145 | 0.74346  | -1.15145 | N | -4.78299 | -11.38297 | -4.51985 |
| C | -2.85336 | 1.48788  | -1.1917  | C | -3.9802  | -12.06212 | -5.47794 |
| H | -1.97972 | 1.12895  | -1.72608 | C | -3.8016  | -13.44999 | -5.39765 |
| C | -2.77704 | 2.72813  | -0.50719 | H | -4.27278 | -14.0023  | -4.5938  |
| C | -3.93168 | 3.20927  | 0.15318  | C | -3.02683 | -14.11428 | -6.34341 |
| H | -3.91199 | 4.1821   | 0.62624  | H | -2.89903 | -15.1883  | -6.2661  |
| C | -5.10821 | 2.48226  | 0.16482  | C | -2.40492 | -13.40882 | -7.37251 |
| H | -5.98567 | 2.88283  | 0.65902  | H | -1.79698 | -13.92853 | -8.10373 |
| C | -5.14945 | 1.23475  | -0.47336 | C | -2.57476 | -12.02718 | -7.45097 |
| C | -6.22511 | 0.26803  | -0.61006 | H | -2.10394 | -11.46626 | -8.25069 |
| C | -7.54287 | 0.27699  | -0.14117 | C | -3.36149 | -11.35697 | -6.51951 |
| H | -7.91956 | 1.10397  | 0.45032  | H | -3.50029 | -10.28538 | -6.59417 |
| C | -8.37242 | -0.79762 | -0.41997 | C | -6.02457 | -11.95143 | -4.11719 |
| H | -9.38739 | -0.8043  | -0.04482 | C | -6.90359 | -12.48466 | -5.06912 |
| C | -7.91119 | -1.89574 | -1.17839 | H | -6.63464 | -12.45541 | -6.11802 |
| C | -6.58283 | -1.89635 | -1.65082 | C | -8.11157 | -13.04897 | -4.67045 |
| H | -6.22675 | -2.73232 | -2.24008 | H | -8.78085 | -13.45709 | -5.41963 |
| C | -5.75493 | -0.82727 | -1.36202 | C | -8.47022 | -13.07675 | -3.32359 |
| C | -3.37183 | -1.72752 | -1.19134 | H | -9.4146  | -13.51112 | -3.01723 |
| H | -3.64918 | -2.67535 | -1.66533 | C | -7.60034 | -12.54113 | -2.37459 |
| H | -2.34863 | -1.51169 | -1.51753 | H | -7.86249 | -12.56407 | -1.32268 |
| C | -3.39796 | -1.8905  | 0.33048  | C | -6.38306 | -11.99032 | -2.76299 |
| H | -4.39706 | -2.14909 | 0.68993  | H | -5.7039  | -11.58899 | -2.02065 |
| H | -3.08173 | -0.97804 | 0.84131  | C | -4.35736 | -10.14668 | -3.97511 |
| H | -2.71855 | -2.69144 | 0.63349  | C | -5.28621 | -9.11667  | -3.7391  |
| C | -4.12683 | -0.60345 | -3.32036 | H | -6.32942 | -9.27447  | -3.98613 |
| H | -3.06683 | -0.43222 | -3.53704 | C | -4.8545  | -7.91716  | -3.19854 |
| H | -4.35332 | -1.60869 | -3.69187 | C | -5.68121 | -6.67577  | -2.86694 |

|   |           |          |          |   |          |           |          |
|---|-----------|----------|----------|---|----------|-----------|----------|
| C | -4.9748   | 0.42206  | -4.07692 | C | -6.38413 | -6.09049  | -4.12538 |
| H | -4.74957  | 1.44362  | -3.76053 | H | -7.1374  | -6.81465  | -4.45543 |
| H | -6.04326  | 0.25074  | -3.92489 | H | -6.93666 | -5.19762  | -3.81307 |
| H | -4.77696  | 0.35619  | -5.14995 | C | -5.46831 | -5.73696  | -5.29983 |
| C | -8.24819  | -4.30277 | -1.57066 | H | -4.9322  | -6.61443  | -5.66968 |
| C | -7.38288  | -4.81497 | -0.59576 | H | -4.72798 | -4.98407  | -5.01903 |
| H | -7.10816  | -4.19853 | 0.25165  | H | -6.05591 | -5.33218  | -6.12818 |
| C | -6.88275  | -6.10832 | -0.71419 | C | -6.77018 | -6.97496  | -1.79678 |
| H | -6.21474  | -6.49308 | 0.04811  | H | -7.31112 | -6.04259  | -1.60155 |
| C | -7.25065  | -6.91235 | -1.79283 | H | -7.49769 | -7.66209  | -2.24322 |
| H | -6.86501  | -7.92145 | -1.87851 | C | -6.26604 | -7.55658  | -0.4737  |
| C | -8.12114  | -6.40784 | -2.75801 | H | -5.57129 | -6.87678  | 0.02514  |
| H | -8.41158  | -7.02226 | -3.60271 | H | -5.75425 | -8.51043  | -0.62332 |
| C | -8.61325  | -5.10966 | -2.65489 | H | -7.10471 | -7.73144  | 0.2055   |
| H | -9.28183  | -4.71685 | -3.41137 | C | -4.60007 | -5.7378   | -2.33249 |
| C | -10.16807 | -2.77562 | -1.63066 | C | -4.72919 | -4.44516  | -1.86583 |
| C | -10.64167 | -1.74585 | -2.45388 | H | -5.68722 | -3.94051  | -1.82731 |
| H | -9.9358   | -1.0978  | -2.95905 | C | -3.59497 | -3.73934  | -1.41881 |
| C | -12.01026 | -1.55839 | -2.62309 | C | -2.34201 | -4.37427  | -1.44626 |
| H | -12.3629  | -0.75803 | -3.26384 | H | -1.45887 | -3.86035  | -1.0902  |
| C | -12.92328 | -2.40219 | -1.99119 | C | -2.20494 | -5.67978  | -1.90919 |
| H | -13.9882  | -2.2578  | -2.13059 | H | -1.22851 | -6.15124  | -1.91596 |
| C | -12.45342 | -3.43468 | -1.18044 | C | -3.33544 | -6.36319  | -2.35787 |
| H | -13.15311 | -4.09482 | -0.68039 | C | -3.49532 | -7.71199  | -2.89685 |
| C | -11.08653 | -3.61902 | -0.99332 | C | -2.56818 | -8.72842  | -3.1345  |
| H | -10.72524 | -4.41586 | -0.35461 | H | -1.51812 | -8.59232  | -2.89964 |
| C | -1.5439   | 3.46794  | -0.61598 | C | -3.0011  | -9.93806  | -3.6625  |
| C | -1.02096  | 4.50028  | 0.12083  | H | -2.2911  | -10.73679 | -3.83612 |
| C | -0.00918  | 5.43728  | -0.40705 | C | -3.80608 | -2.34458  | -0.91886 |
| C | -1.44823  | 5.05362  | 1.41518  | C | -2.62833 | -1.49915  | -0.61783 |
| C | -0.20736  | 6.70355  | 0.3152   | H | -1.6353  | -1.88363  | -0.81214 |
| C | -1.08687  | 6.47634  | 1.40272  | C | -2.79503 | -0.25483  | -0.12712 |
| C | 0.30231   | 7.98115  | 0.08246  | H | -3.81864 | 0.07314   | 0.03755  |
| C | -1.45507  | 7.52113  | 2.24822  | C | -1.77911 | 0.70681   | 0.21015  |
| C | -0.08048  | 9.02145  | 0.92746  | C | -1.99319 | 1.97402   | 0.71222  |
| H | 0.97097   | 8.18286  | -0.74065 | H | -2.98761 | 2.35833   | 0.89966  |
| C | -0.95017  | 8.79555  | 1.99571  | C | -0.80073 | 2.70333   | 0.95099  |
| H | -2.13206  | 7.36617  | 3.07542  | H | -0.77396 | 3.71115   | 1.3427   |
| H | 0.30002   | 10.01925 | 0.74617  | C | 0.32227  | 1.99155   | 0.63084  |
| H | -1.24185  | 9.61965  | 2.6353   | H | 1.3544   | 2.29703   | 0.71067  |
| H | -0.9742   | 3.19311  | -1.49584 |   |          |           |          |
| C | -1.86846  | 4.3324   | 2.50852  |   |          |           |          |
| C | -1.91335  | 2.90837  | 2.52996  |   |          |           |          |
| N | -1.92419  | 1.75537  | 2.61078  |   |          |           |          |
| C | -2.19282  | 4.93698  | 3.75772  |   |          |           |          |
| N | -2.47334  | 5.39454  | 4.78208  |   |          |           |          |
| C | 0.96718   | 5.18009  | -1.34402 |   |          |           |          |
| C | 1.9002    | 6.16108  | -1.78879 |   |          |           |          |
| N | 2.67634   | 6.92477  | -2.17873 |   |          |           |          |
| C | 1.18947   | 3.89613  | -1.92173 |   |          |           |          |

|   |          |           |          |
|---|----------|-----------|----------|
| N | 1.40746  | 2.87022   | -2.40949 |
|   | 7        |           |          |
| S | -2.51374 | 2.3163    | 1.01793  |
| N | -4.70938 | -11.38838 | -4.51437 |
| C | -3.94687 | -12.04524 | -5.52003 |
| C | -3.73396 | -13.42912 | -5.45792 |
| H | -4.14731 | -13.99532 | -4.63222 |
| C | -2.99906 | -14.07171 | -6.44942 |
| H | -2.84369 | -15.14299 | -6.38581 |
| C | -2.45136 | -13.34781 | -7.50746 |
| C | -2.65541 | -11.96992 | -7.56828 |
| H | -2.2425  | -11.3951  | -8.38981 |
| C | -3.40313 | -11.32165 | -6.59033 |
| H | -3.56926 | -10.25304 | -6.6507  |
| C | -5.91544 | -11.98451 | -4.04882 |
| C | -6.83392 | -12.53013 | -4.95544 |
| H | -6.62289 | -12.48935 | -6.01712 |
| C | -8.00692 | -13.12127 | -4.49586 |
| H | -8.70748 | -13.53872 | -5.21051 |
| C | -8.29136 | -13.16417 | -3.13178 |
| C | -7.38211 | -12.61655 | -2.22758 |
| H | -7.58615 | -12.65132 | -1.16318 |
| C | -6.19901 | -12.03874 | -2.67747 |
| H | -5.48856 | -11.62837 | -1.97017 |
| C | -4.27884 | -10.14754 | -3.98461 |
| C | -5.2138  | -9.13834  | -3.68823 |
| H | -6.26582 | -9.31673  | -3.87699 |
| C | -4.77658 | -7.93411  | -3.16376 |
| C | -5.60761 | -6.71195  | -2.77527 |
| C | -6.39416 | -6.13403  | -3.98678 |
| H | -7.14857 | -6.87304  | -4.27891 |
| H | -6.94921 | -5.25634  | -3.63733 |
| C | -5.55506 | -5.7522   | -5.20868 |
| H | -5.0213  | -6.61504  | -5.61432 |
| H | -4.81683 | -4.98434  | -4.96527 |
| H | -6.19792 | -5.35646  | -5.99945 |
| C | -6.62571 | -7.04161  | -1.64589 |
| H | -7.17557 | -6.12319  | -1.41201 |
| H | -7.36312 | -7.74113  | -2.05494 |
| C | -6.03319 | -7.62148  | -0.35919 |
| H | -5.32407 | -6.93125  | 0.10393  |
| H | -5.51149 | -8.56307  | -0.54666 |
| H | -6.82683 | -7.81905  | 0.36628  |
| C | -4.51582 | -5.756    | -2.29704 |
| C | -4.64105 | -4.46633  | -1.81359 |
| H | -5.61587 | -3.99555  | -1.73142 |
| C | -3.49892 | -3.7383   | -1.4167  |
| C | -2.23527 | -4.35532  | -1.52648 |
| H | -1.34671 | -3.81248  | -1.22695 |
| C | -2.10164 | -5.64742  | -2.01165 |

|   |          |           |          |
|---|----------|-----------|----------|
| H | -1.11825 | -6.09833  | -2.08693 |
| C | -3.24532 | -6.35417  | -2.3994  |
| C | -3.40676 | -7.70201  | -2.93811 |
| C | -2.47414 | -8.69747  | -3.2356  |
| H | -1.41544 | -8.54136  | -3.05939 |
| C | -2.91179 | -9.91247  | -3.74751 |
| H | -2.19648 | -10.69494 | -3.96724 |
| C | -3.68238 | -2.38476  | -0.91309 |
| C | -2.74475 | -1.51744  | -0.48341 |
| H | -1.69409 | -1.77811  | -0.47749 |
| C | -3.13528 | -0.17565  | -0.00535 |
| C | -2.06078 | 0.72714   | 0.44975  |
| C | -0.69523 | 0.55403   | 0.51857  |
| H | -0.19165 | -0.35429  | 0.2179   |
| C | -0.01212 | 1.68866   | 1.02438  |
| H | 1.06069  | 1.74361   | 1.15225  |
| C | -0.8661  | 2.71411   | 1.33526  |
| H | -0.61714 | 3.68566   | 1.735    |
| H | -4.7086  | -2.02657  | -0.87902 |
| O | -4.30473 | 0.20159   | 0.02332  |
| H | -9.20876 | -13.61959 | -2.77776 |
| H | -1.87413 | -13.85052 | -8.27456 |
